# Supplementary material for: Multiomics Approach Reveals an Important Role of BNIP3 in Myocardial Remodeling and the Pathogenesis of Heart Failure with Reduced Ejection Fraction
Source: MDPI journal article supplement (doi:10.3390/cells11091572), 2022-05-06
Supplement: s1 [file s1]

## Supplemental Table and Figures

**Table S1. Echocardiographic parameters of the animals that were studied in Sham, ShLuc and ShBNIP3 groups.**

|                  | Wk3-post-AAB    |                 |                 | Wk8-HFrEF development |                 |                 | Wk4-post-Rx     |                 |                  | Two-way ANOVA    |               |                  |
|------------------|-----------------|-----------------|-----------------|-----------------------|-----------------|-----------------|-----------------|-----------------|------------------|------------------|---------------|------------------|
| Para-meters      | Sham<br>n=3     | ShLuc<br>n=3    | ShBNIP3<br>n=3  | Sham<br>n=3           | ShLuc<br>n=3    | ShBNIP3<br>n=3  | Sham<br>n=3     | ShLuc<br>n=3    | ShBNIP3<br>n=3   | Interac-<br>tion | Row<br>Factor | Column<br>Factor |
| HW/BW<br>(mg/g)  |                 |                 |                 |                       |                 |                 | 2.35 ±<br>0.13  | 4.67 ±<br>0.16* | 4.76 ±<br>0.51*  | NA               | NA            | NA               |
| LVW/BW<br>(mg/g) |                 |                 |                 |                       |                 |                 | 1.66 ±<br>0.14  | 3.17 ±<br>0.04* | 3.16 ±<br>0.27*  | NA               | NA            | NA               |
| RVW/BW<br>(mg/g) |                 |                 |                 |                       |                 |                 | 0.41 ±<br>0.03  | 1.00 ±<br>0.20* | 0.80 ±<br>0.03*† | NA               | NA            | NA               |
| BW (g)           | 322 ±<br>8      | 318 ±<br>16     | 324 ± 15        | 496 ±<br>10           | 478 ±<br>34     | 512 ± 62        | 559 ±<br>8      | 503 ±<br>61     | 546 ± 62         | NS               | ****          | NS               |
| IVSd<br>(cm)     | 0.17 ±<br>0.001 | 0.26 ±<br>0.01* | 0.28 ±<br>0.02* | 0.19 ±<br>0.01        | 0.27 ±<br>0.01* | 0.28 ±<br>0.03* | 0.19 ±<br>0.01  | 0.26 ±<br>0.02  | 0.28 ±<br>0.02   | NS               | NS            | ****             |
| LVPWd<br>(cm)    | 0.17 ±<br>0.01  | 0.26 ±<br>0.01* | 0.29 ±<br>0.01* | 0.21 ±<br>0.02        | 0.28 ±<br>0.01* | 0.29 ±<br>0.02* | 0.2 ±<br>0.004  | 0.28 ±<br>0.04* | 0.29 ±<br>0.01*  | NS               | NS            | ****             |
| LVIDd<br>(cm)    | 0.68 ±<br>0.06  | 0.58 ±<br>0.04* | 0.57 ±<br>0.06* | 0.69 ±<br>0.03        | 0.83 ±<br>0.03* | 0.85 ±<br>0.04* | 0.70 ±<br>0.01  | 0.94 ±<br>0.06* | 0.86 ±<br>0.06*† | ****             | ****          | P=0.001          |
| LVIDs<br>(%)     | 0.26 ±<br>0.04  | 0.14 ±<br>0.03* | 0.14 ±<br>0.03* | 0.28 ±<br>0.02        | 0.47 ±<br>0.01* | 0.49 ±<br>0.01* | 0.27 ±<br>0.002 | 0.62 ±<br>0.07* | 0.42 ±<br>0.07*† | ****             | ****          | ****             |
| LVFS<br>(%)      | 62 ± 3          | 78 ± 1*         | 76 ± 4*         | 60 ± 2                | 42 ± 4*         | 42 ± 4*         | 62 ± 2          | 34 ± 3*         | 52 ± 5*†         | ****             | ****          | ****             |
| LVEDV<br>(μl)    | 472 ±<br>36     | 352 ±<br>45*    | 333 ± 12*       | 561 ±<br>71           | 901 ±<br>116*   | 901 ±<br>101*   | 557 ±<br>36     | 1068 ±<br>122*  | 724 ±<br>43*†    | ****             | ****          | ****             |
| LVESV<br>(μl)    | 90 ±<br>15      | 40 ± 9          | 37 ± 10         | 102 ±<br>23           | 432 ±<br>63*    | 400 ± 36*       | 104 ±<br>9      | 659 ±<br>81*    | 220 ±<br>72*†    | ****             | ****          | ****             |
| LVEF<br>(%)      | 81 ± 2          | 89 ±<br>1.4*    | 89 ± 3*         | 82 ± 2                | 52 ± 1*         | 56 ± 2*         | 81 ± 1          | 38 ± 2*         | 71 ± 6*†         | ****             | ****          | ****             |

Data are presented as mean ± standard deviation. Statistical analysis was performed in Prism software version 9.1.0. One-way ANOVA with Benjamini, Krieger and Yekutieli correction method for multiple comparisons was used to assess statistical significance for the following parameters: HW/BW, LVW/BW, and RVW/BW. The remaining echocardiographic parameters were analyzed by two-way ANOVA with Benjamini, Krieger and Yekutieli correction method for multiple comparisons of cell means regardless of rows and columns to assess for statistical significance and interaction. The rows represent the time points at which echocardiographic parameters were obtained (wk3 post-AAB, wk8-time of HF development and treatment (Rx), and wk4-post Rx). The columns represent the studied groups: Sham, ShLuc, and ShBNIP3. A p-value of < 0.05 was considered significant.

**Abbreviations:** NA: not applicable, NS: not significant, IVSd: Interventricular septal diameter, LVPWd: left ventricular (LV) posterior wall diameter, LVIDd: LV end-diastolic diameter, LVIDs: LV end-systolic diameter, LVEDV: LV end-diastolic volume, LVESV: LV end-systolic volume, LVEF: LV ejection fraction, BW: body weight, HW: heart weight, LVW: LV weight, and RVW: right ventricular weight.

\*P < 0.05 vs Sham

†P < 0.05 vs ShLuc

\*\*\*\*P < 0.0001

## Figures and figure legends

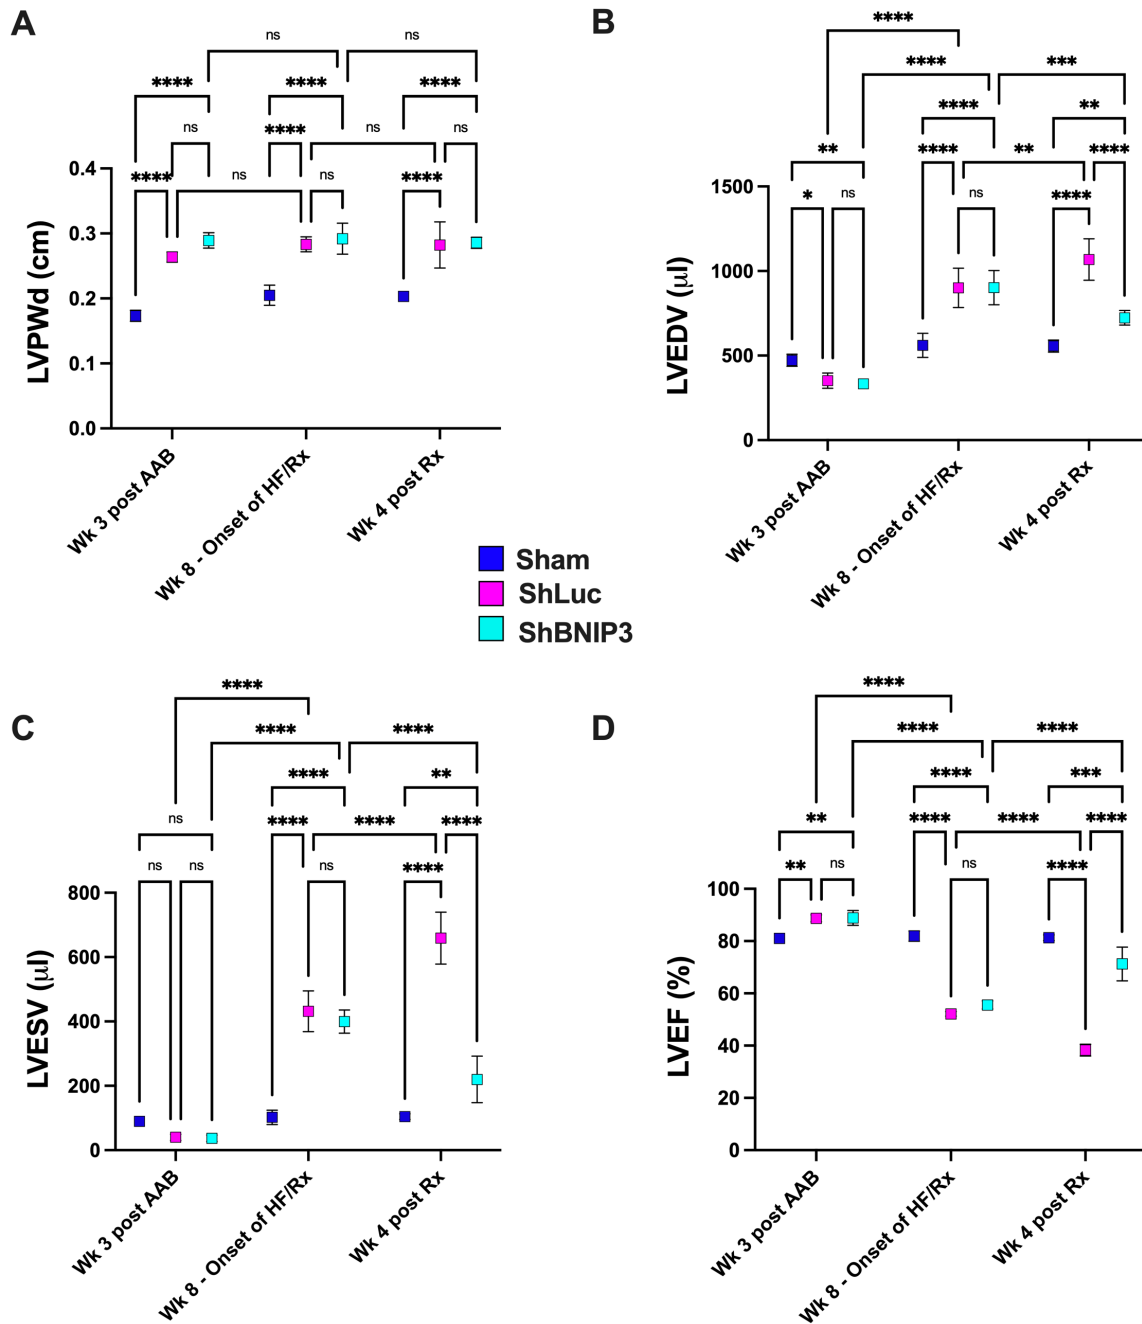

**Figure S1. Echocardiographic parameters in Sham, ShLuc and ShBNIP3 groups.** LV posterior wall thickness (LVPWd) (**A**), LV end-diastolic (LVEDV) and end-systolic volumes (LVESV) (**B-C**), and LV ejection fraction (LVEF) (**D**) are shown at the time points of: concentric remodeling (week (wk)3 post-AAB), HF development and gene delivery (wk8 post-AAB) and wk4 post treatment (Rx) (wk12 post-AAB). \*P < 0.05.



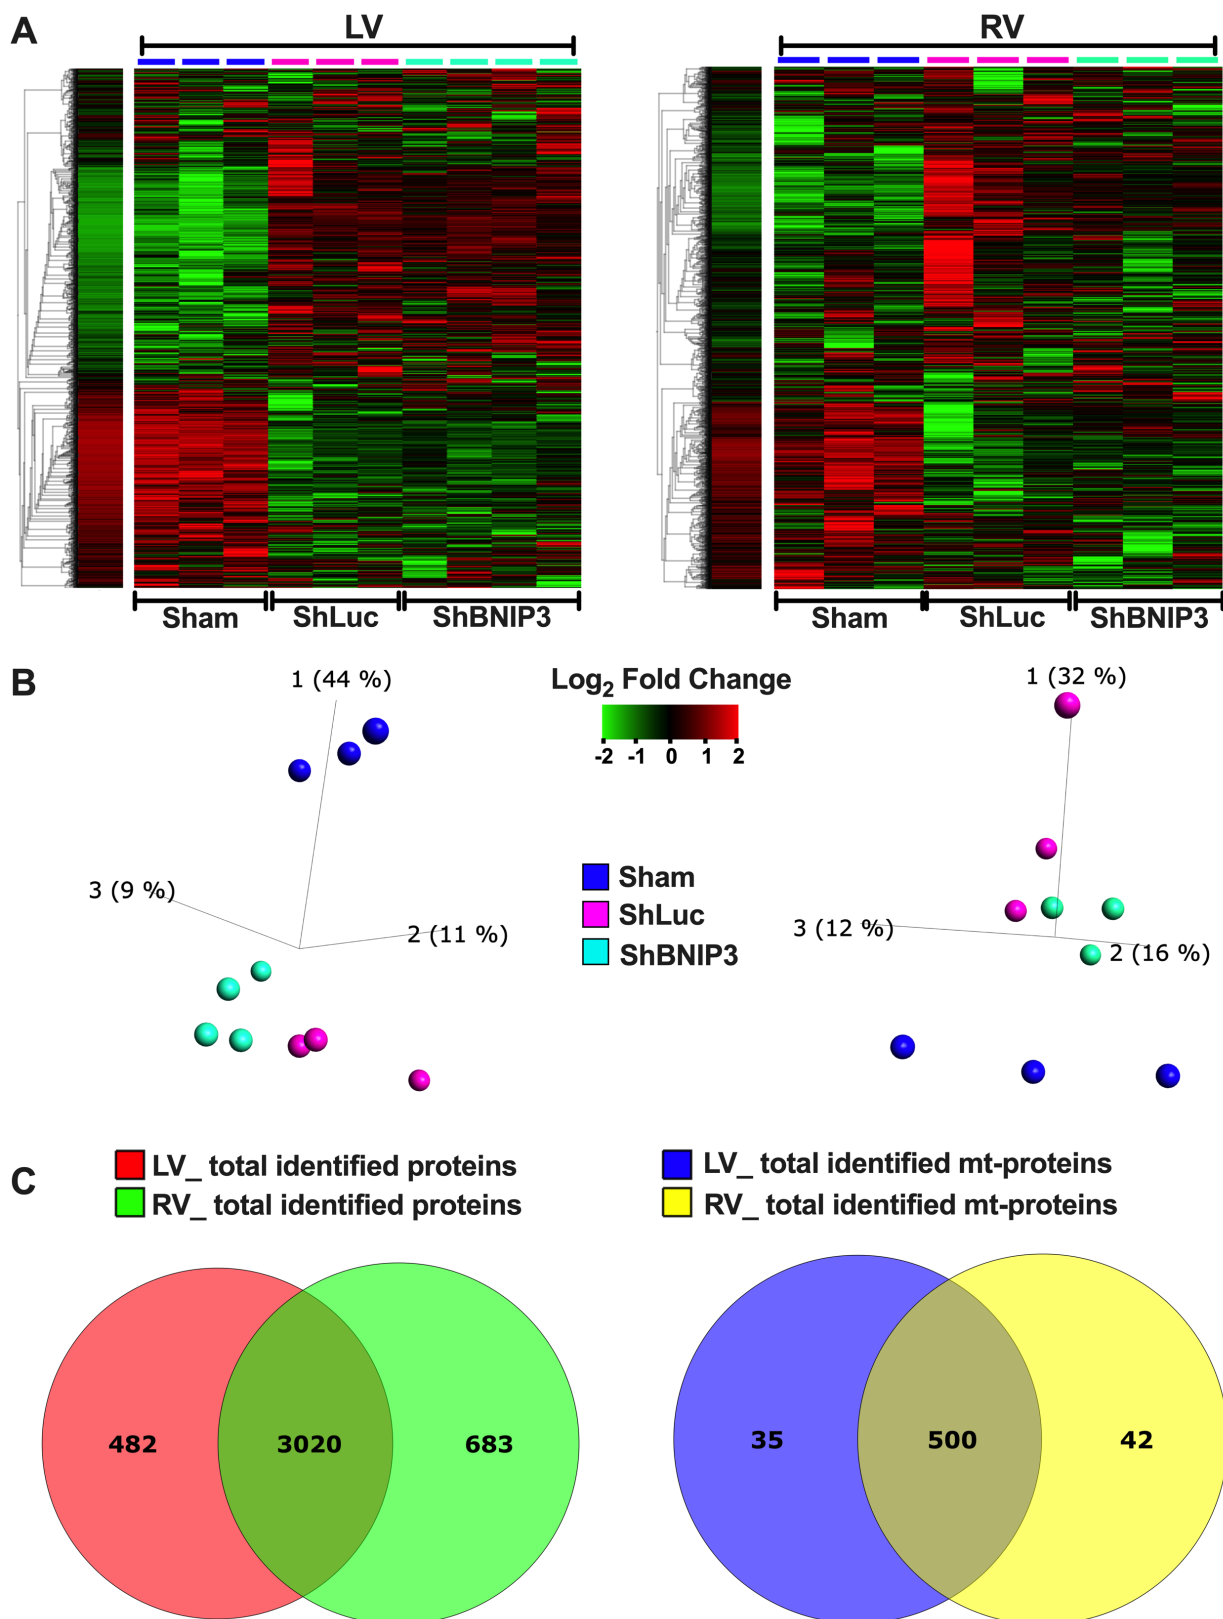

**Figure S2. Visualization of the total identified proteins in LV and RV myocardium proteomic datasets.** **A-B.** Heat maps and PCA plots show the relative log<sub>2</sub> fold expression and the variance in biological samples, respectively, in Sham, ShLuc and ShBNIP3 groups of the total identified proteins in LV (left), and RV (right) shotgun proteomic datasets. **C.** Venn diagrams show the number of total identified proteins (left) and mitochondrial (mt)-proteins in LV and RV shotgun proteomic datasets. The intersection between the Venn diagrams show the number of proteins and mt-proteins that were commonly identified in LV and RV shotgun proteomic datasets.

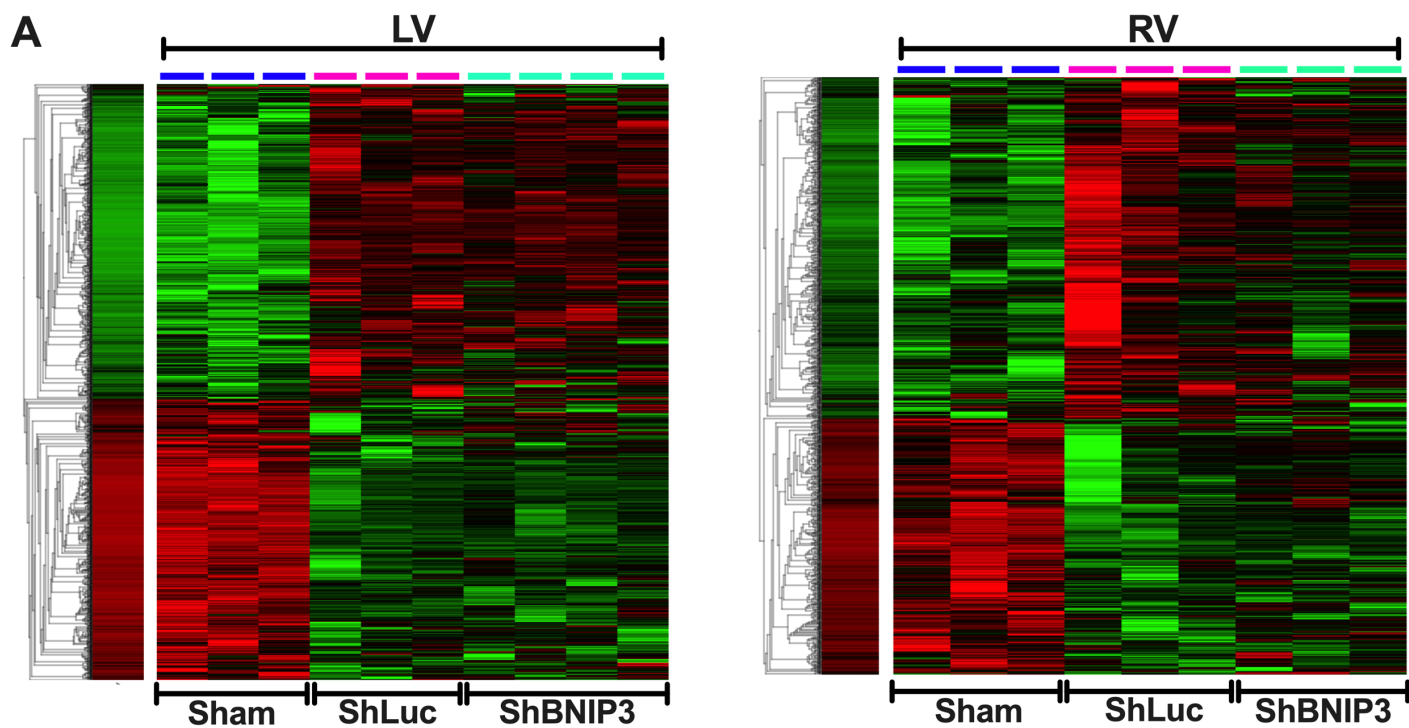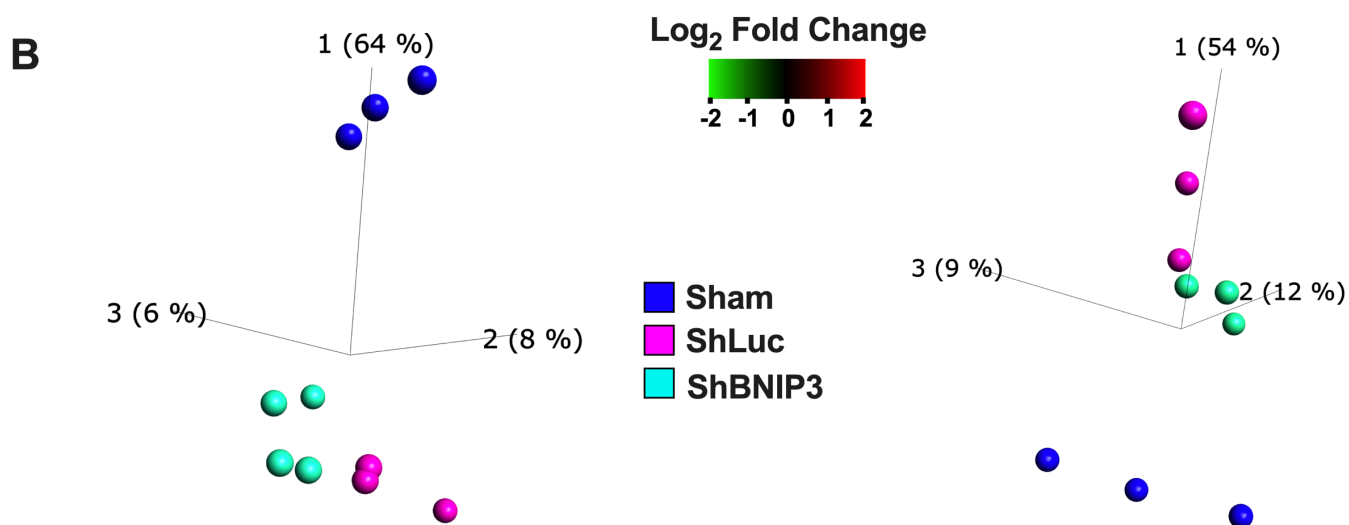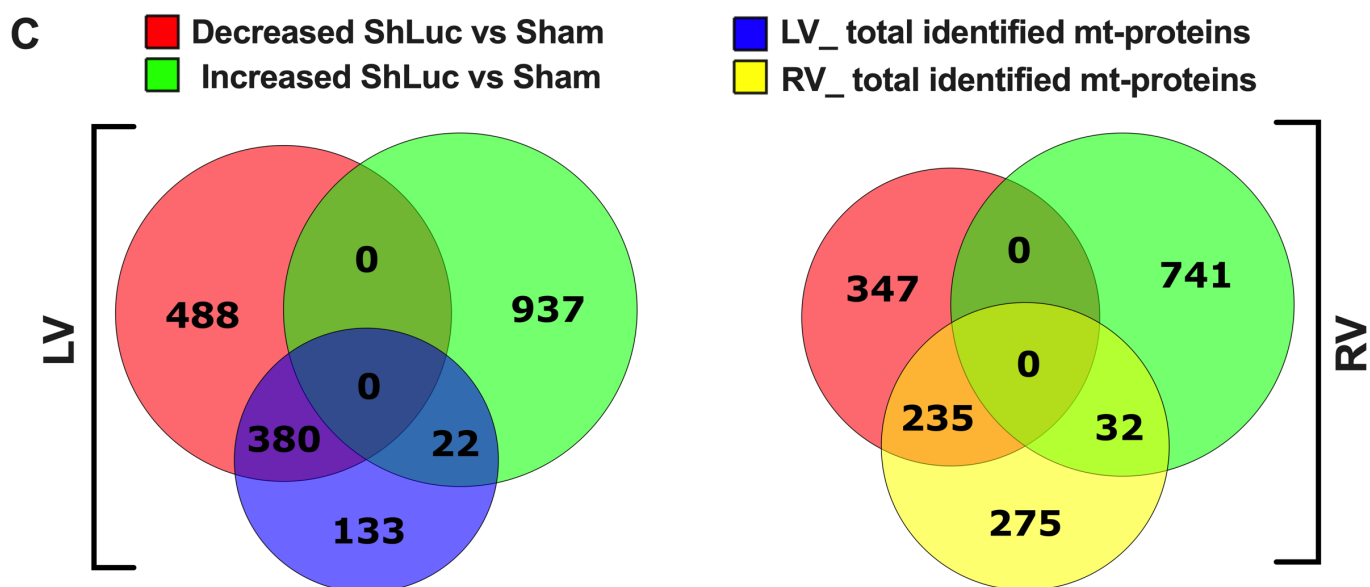

A Venn diagram with three overlapping circles labeled red, green, and blue. The counts for each region are: red only: 299, green only: 158, blue only: 189, red and green: 175, red and blue: 0, green and blue: 30, and all three: 205.

**Figure S3. Visualization of the differentially expressed proteins in ShLuc vs Sham groups in LV and RV myocardium proteomic datasets.** **A-B.** Heat maps and PCA plots show the relative log<sub>2</sub> fold expression and the variance in biological samples, respectively, in Sham, ShLuc and ShBNIP3 groups of the differentially expressed proteins in ShLuc vs Sham groups in LV (left), and RV (right) shotgun proteomic datasets. **C.** Venn diagrams show the number of differentially expressed proteins that were downregulated (red) or upregulated (green) in ShLuc vs Sham in LV (left) and RV (right) shotgun proteomic datasets, and how many of these were mitochondrial (mt)-proteins (intersection of blue or yellow with red and green diagrams). **D-F.** Venn diagrams show the total number of differentially expressed proteins and mt-proteins in ShLuc vs Sham (**D**), and how many of these were downregulated (**E**), or upregulated (**F**) in ShLuc vs Sham in the LV (red and green) and RV (yellow and blue) proteomic datasets, respectively. They also show the number of the commonly identified proteins (intersection of red with yellow) and mt-proteins (intersection of green with blue) that were differentially expressed, downregulated or upregulated, between the LV and RV proteomic datasets.

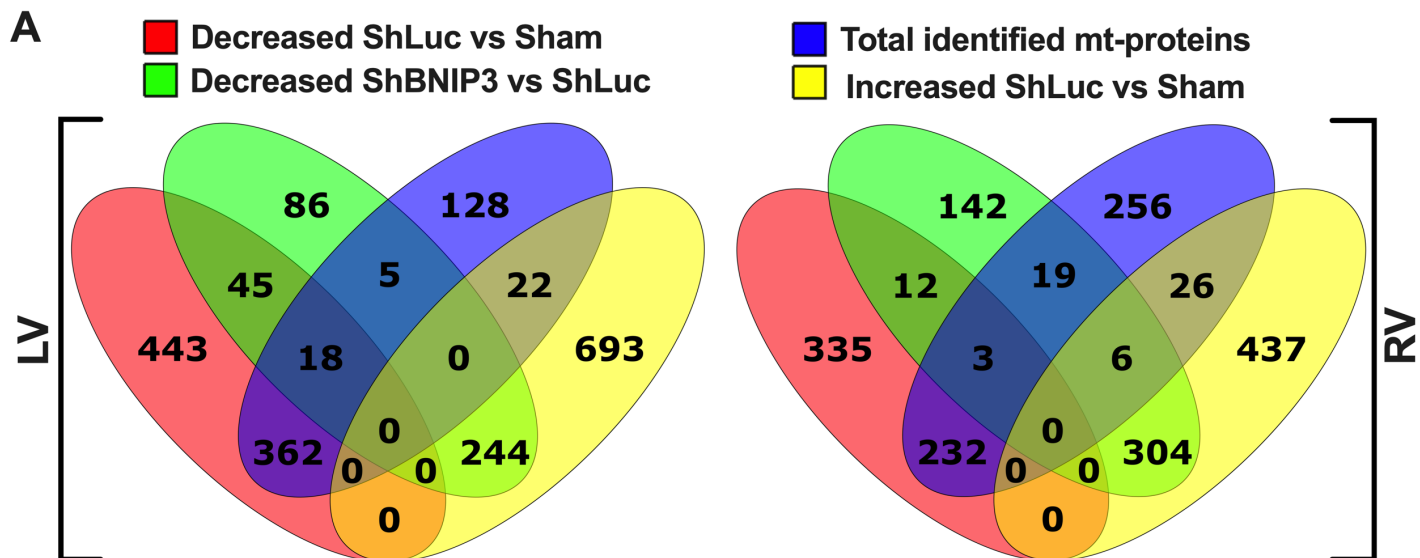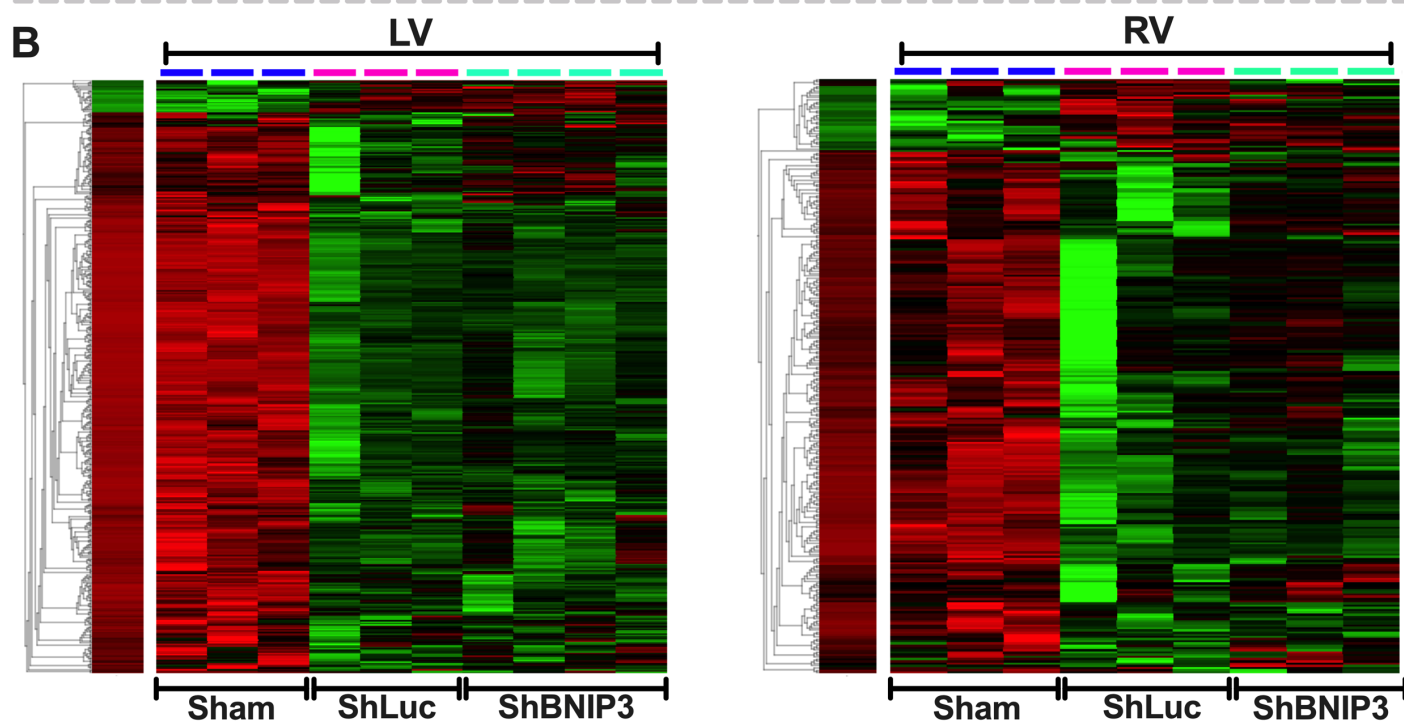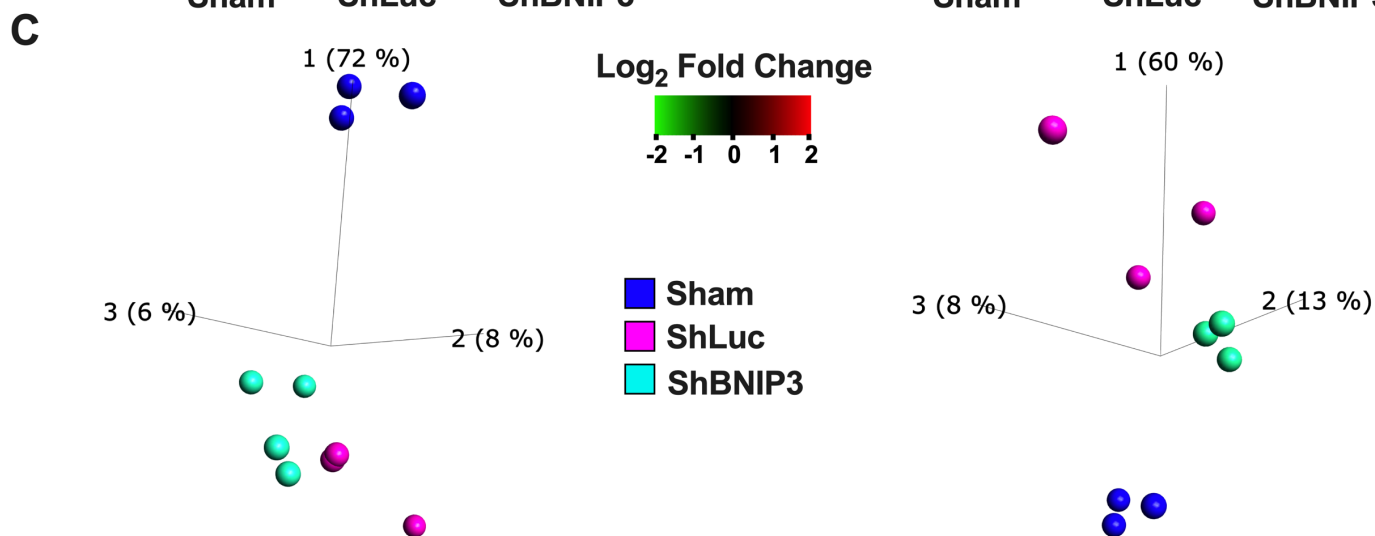

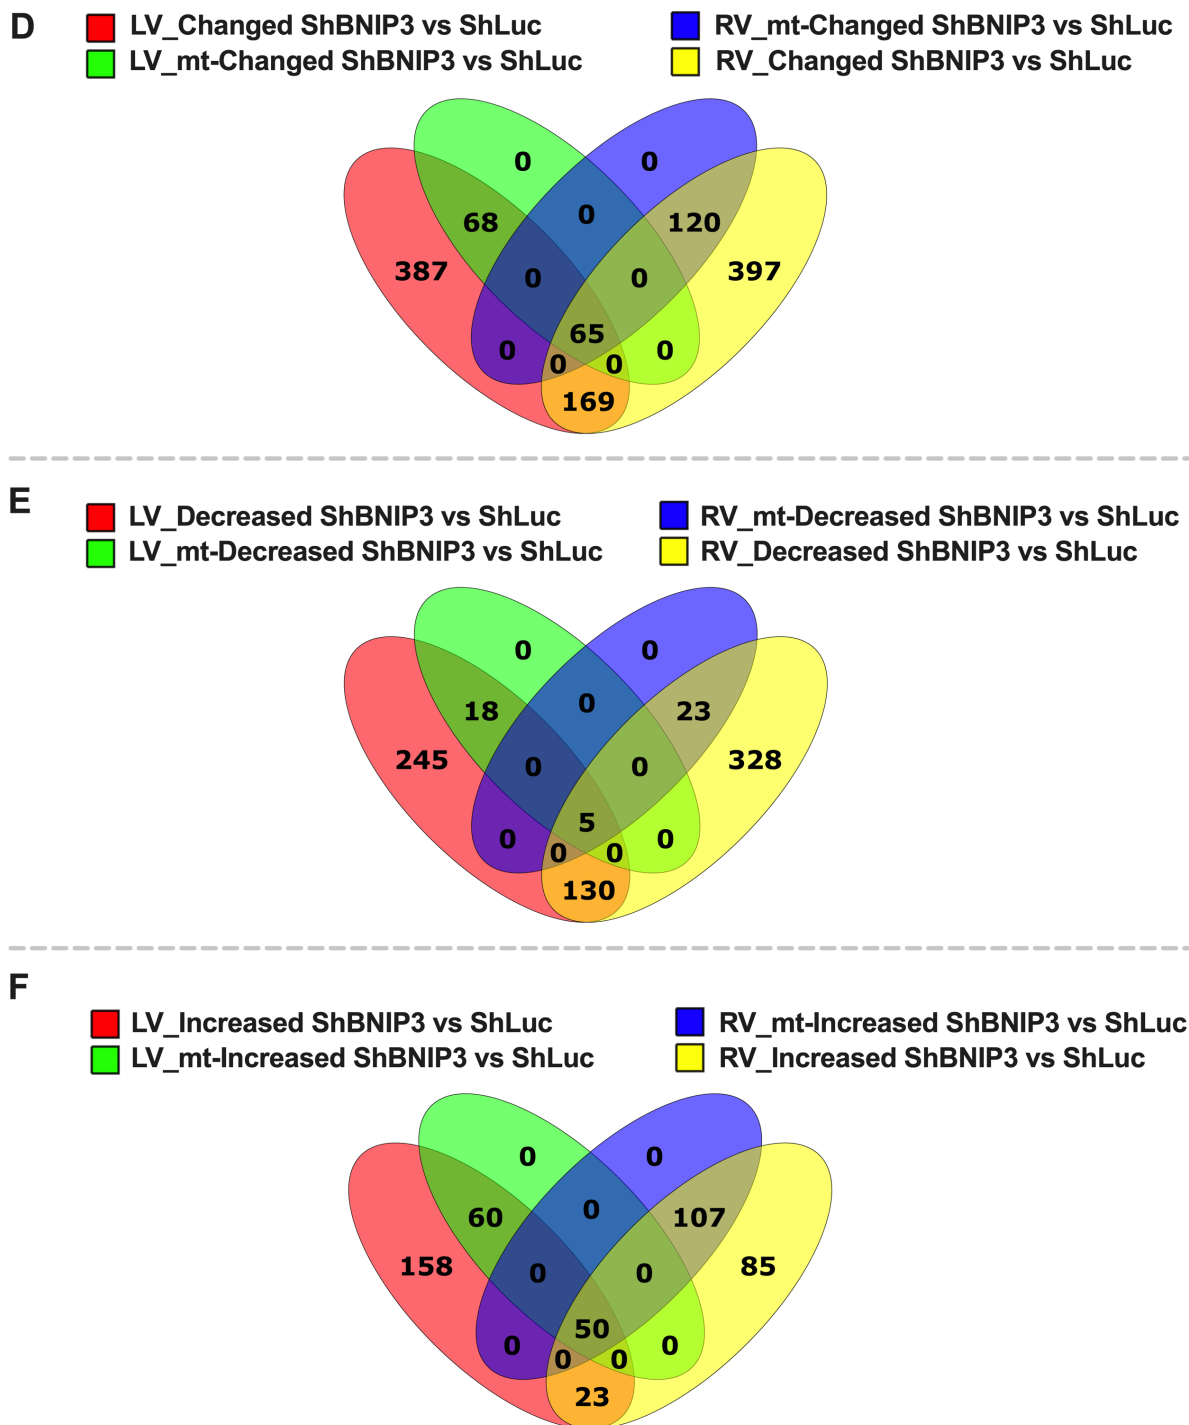

**Figure S4. Visualization of the differentially expressed mt-proteins in ShLuc vs Sham groups and ShBNIP3 vs ShLuc groups in the LV and RV myocardium proteomic datasets.** A. Venn diagrams show the number of differentially expressed proteins that were downregulated (red) or upregulated (yellow) in ShLuc vs Sham in LV (left) and RV (right) shotgun proteomic datasets, and how many of these were mt-proteins (intersection of blue with red and yellow diagrams). They also show the number of differentially expressed proteins that were downregulated in ShBNIP3 vs ShLuc (green), and how many of these were mt-proteins (intersection of blue with green diagrams). B-C. Heat maps and PCA plots show the relative log<sub>2</sub> fold expression and the variance in biological samples, respectively, in Sham, ShLuc and ShBNIP3 groups of the differentially expressed mt-proteins in ShLuc vs Sham in LV (left), and RV (right) shotgun proteomic datasets. D-F. Venn diagrams show the total number of differentially expressed proteins and mt-proteins in ShBNIP3 vs ShLuc (D), and how many of these were downregulated (E), or upregulated (F) in ShBNIP3 vs ShLuc in the LV (red and green) and RV (yellow and blue) proteomic datasets, respectively. They also show the number of the commonly identified proteins (intersection of red with yellow) and mt-proteins (intersection of green with blue) that were differentially expressed, downregulated or upregulated, between the LV and RV proteomic datasets.

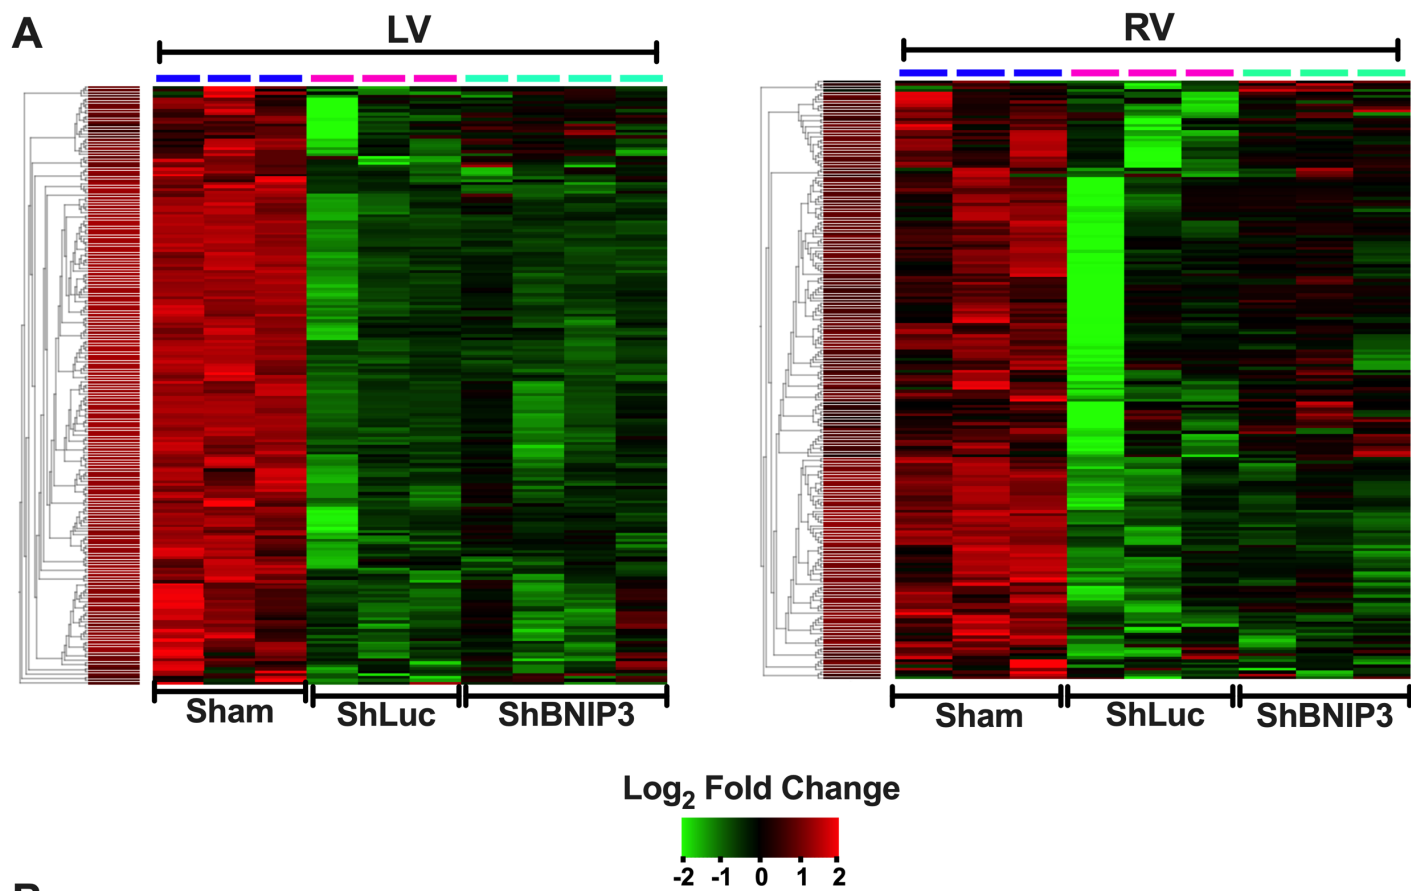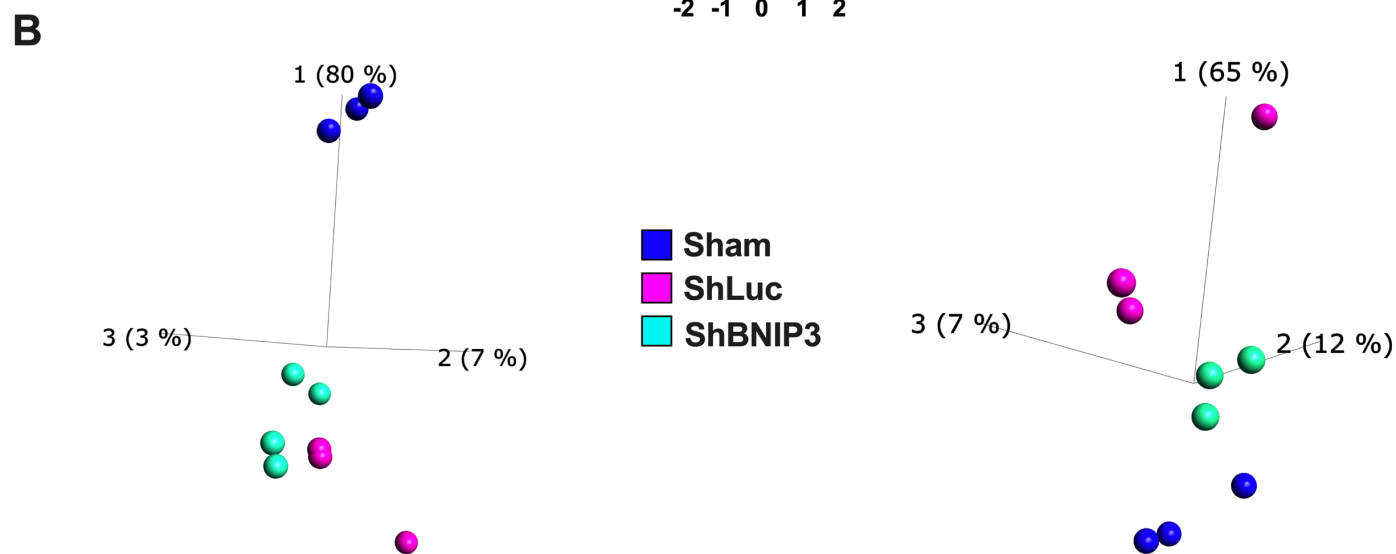



C

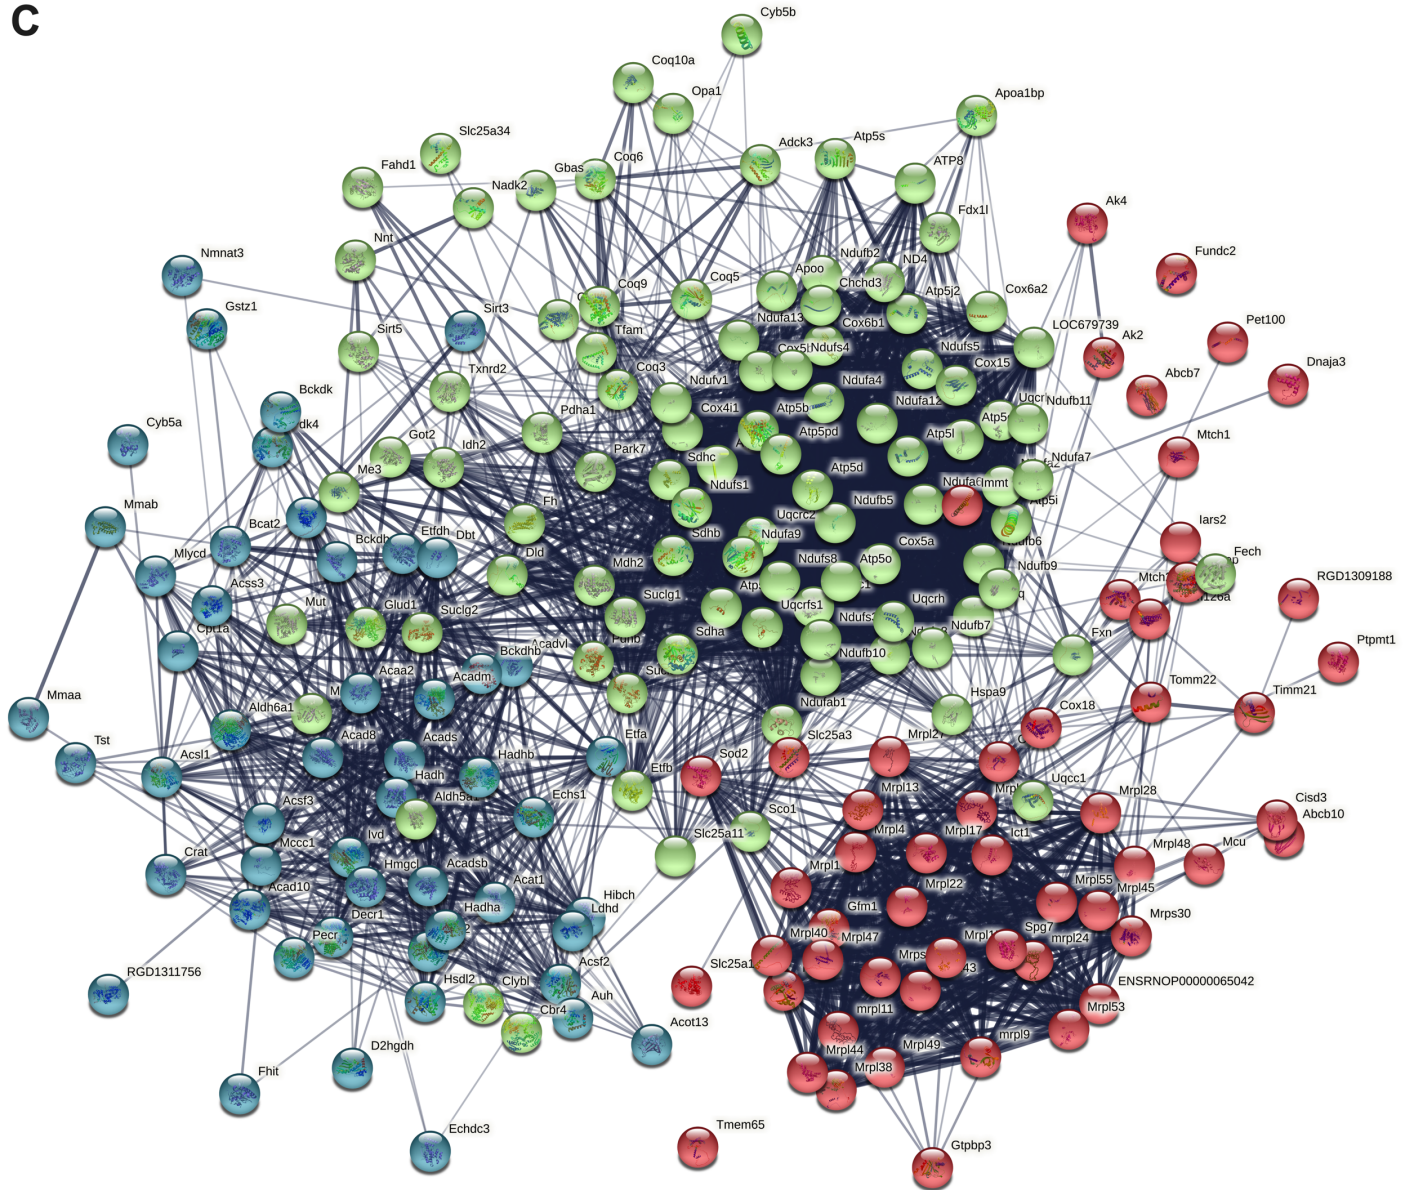

D

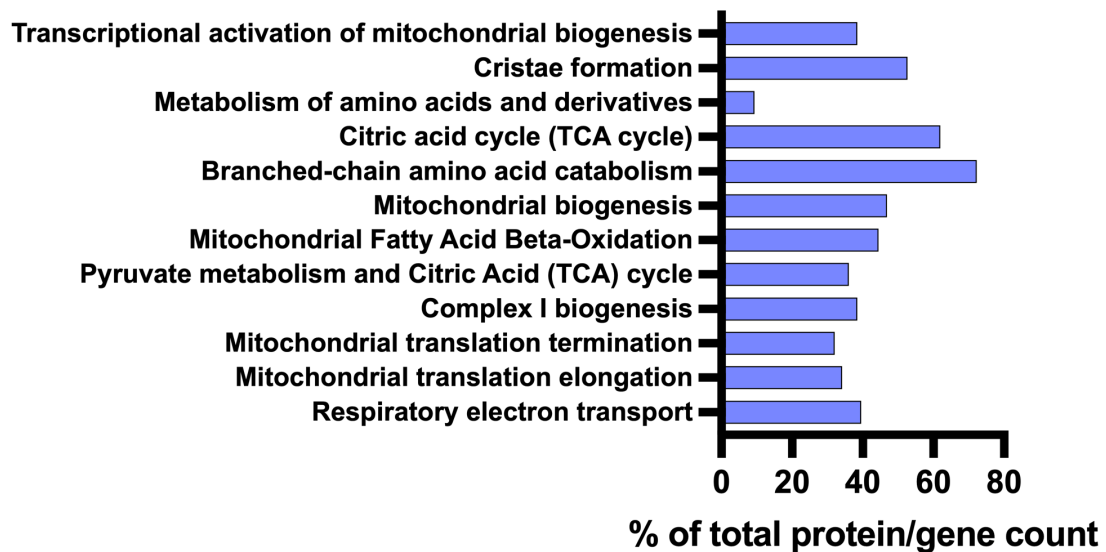

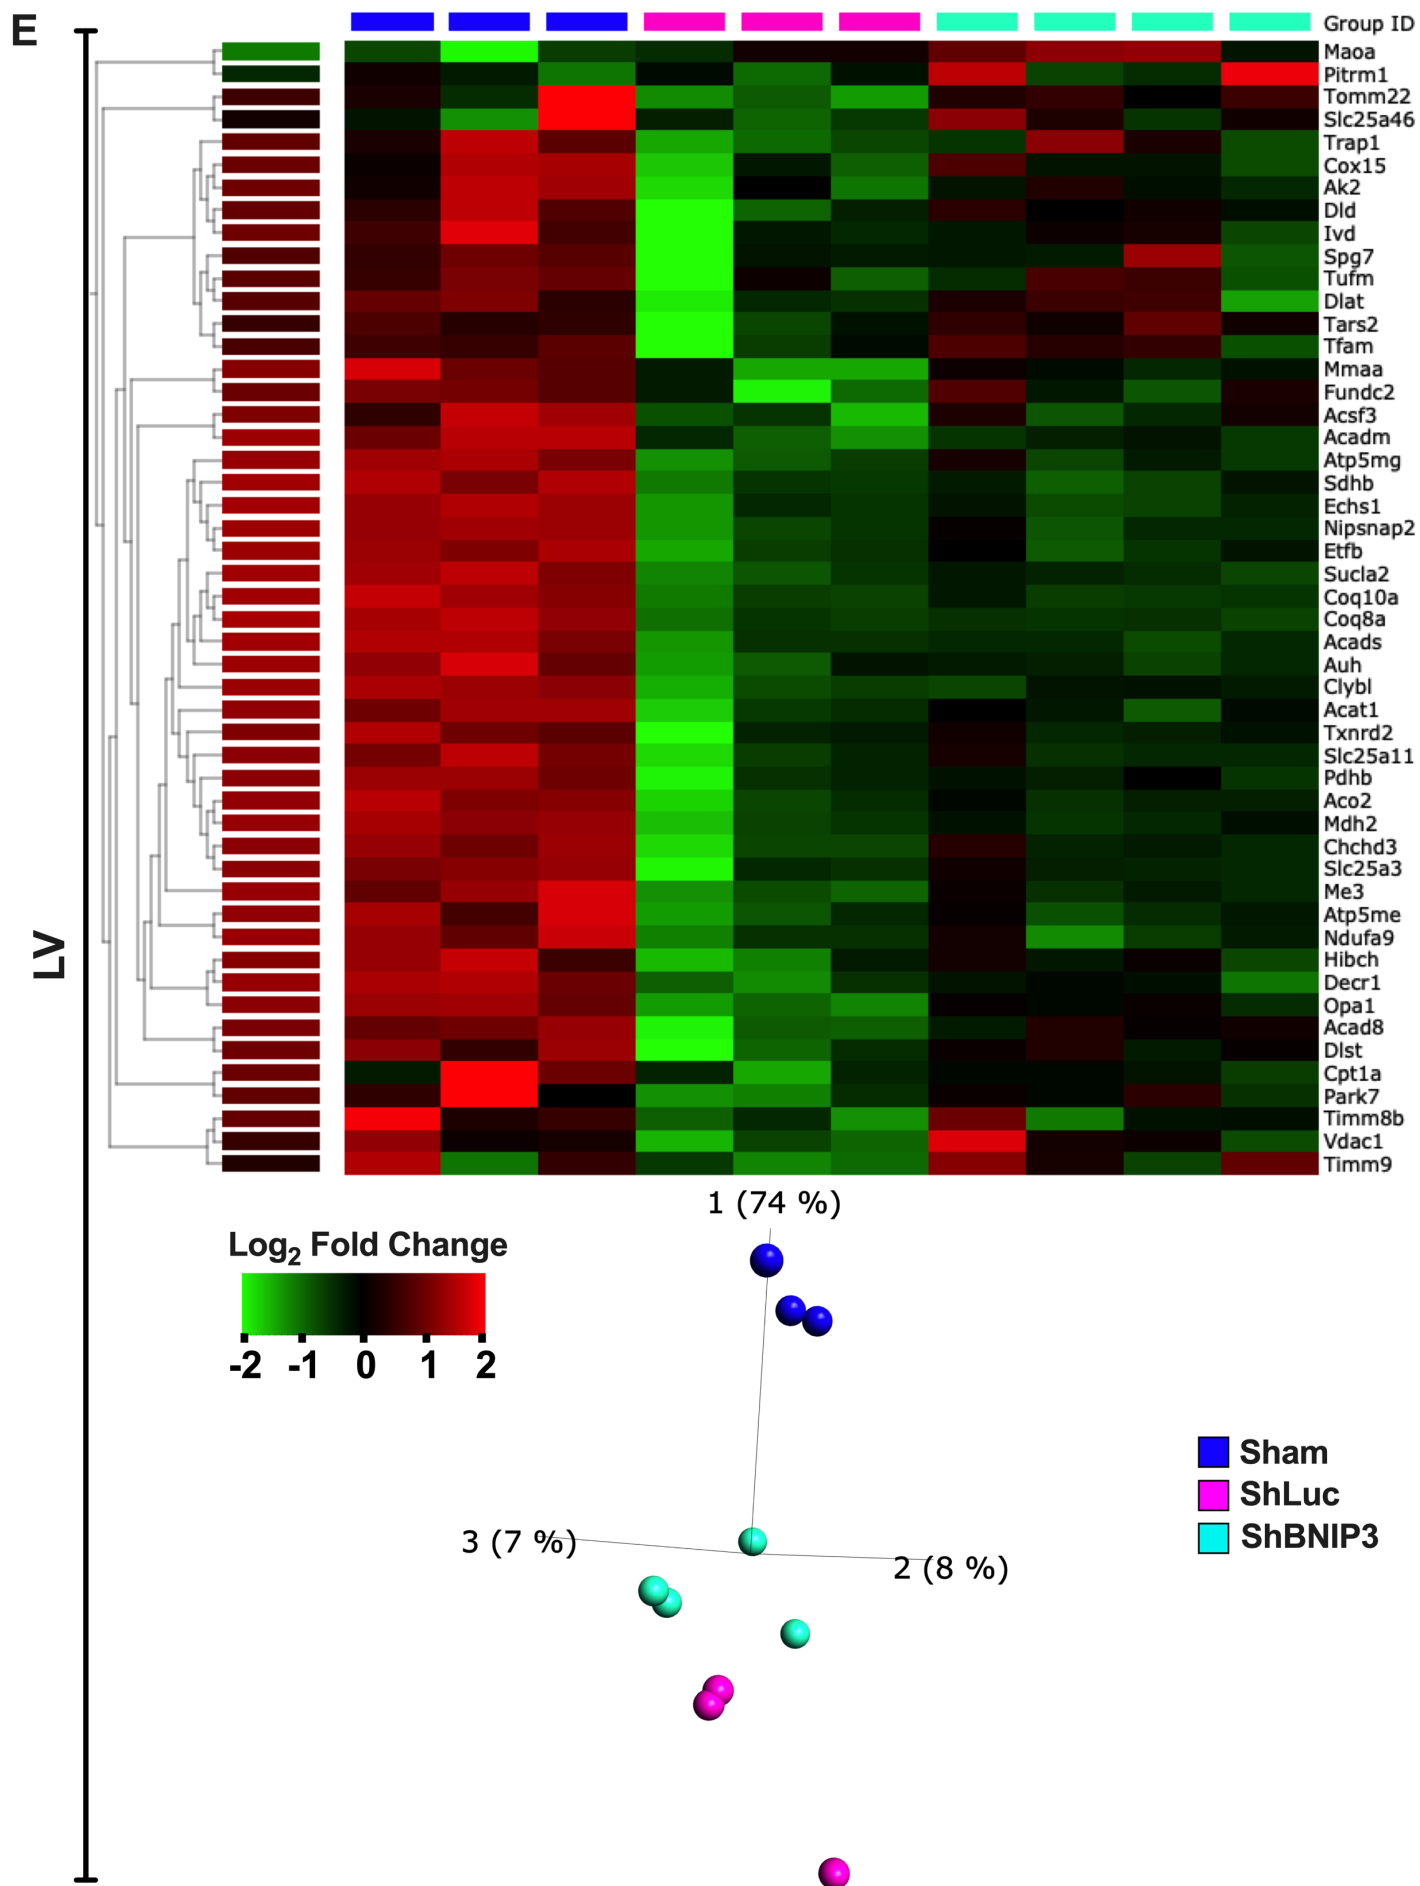



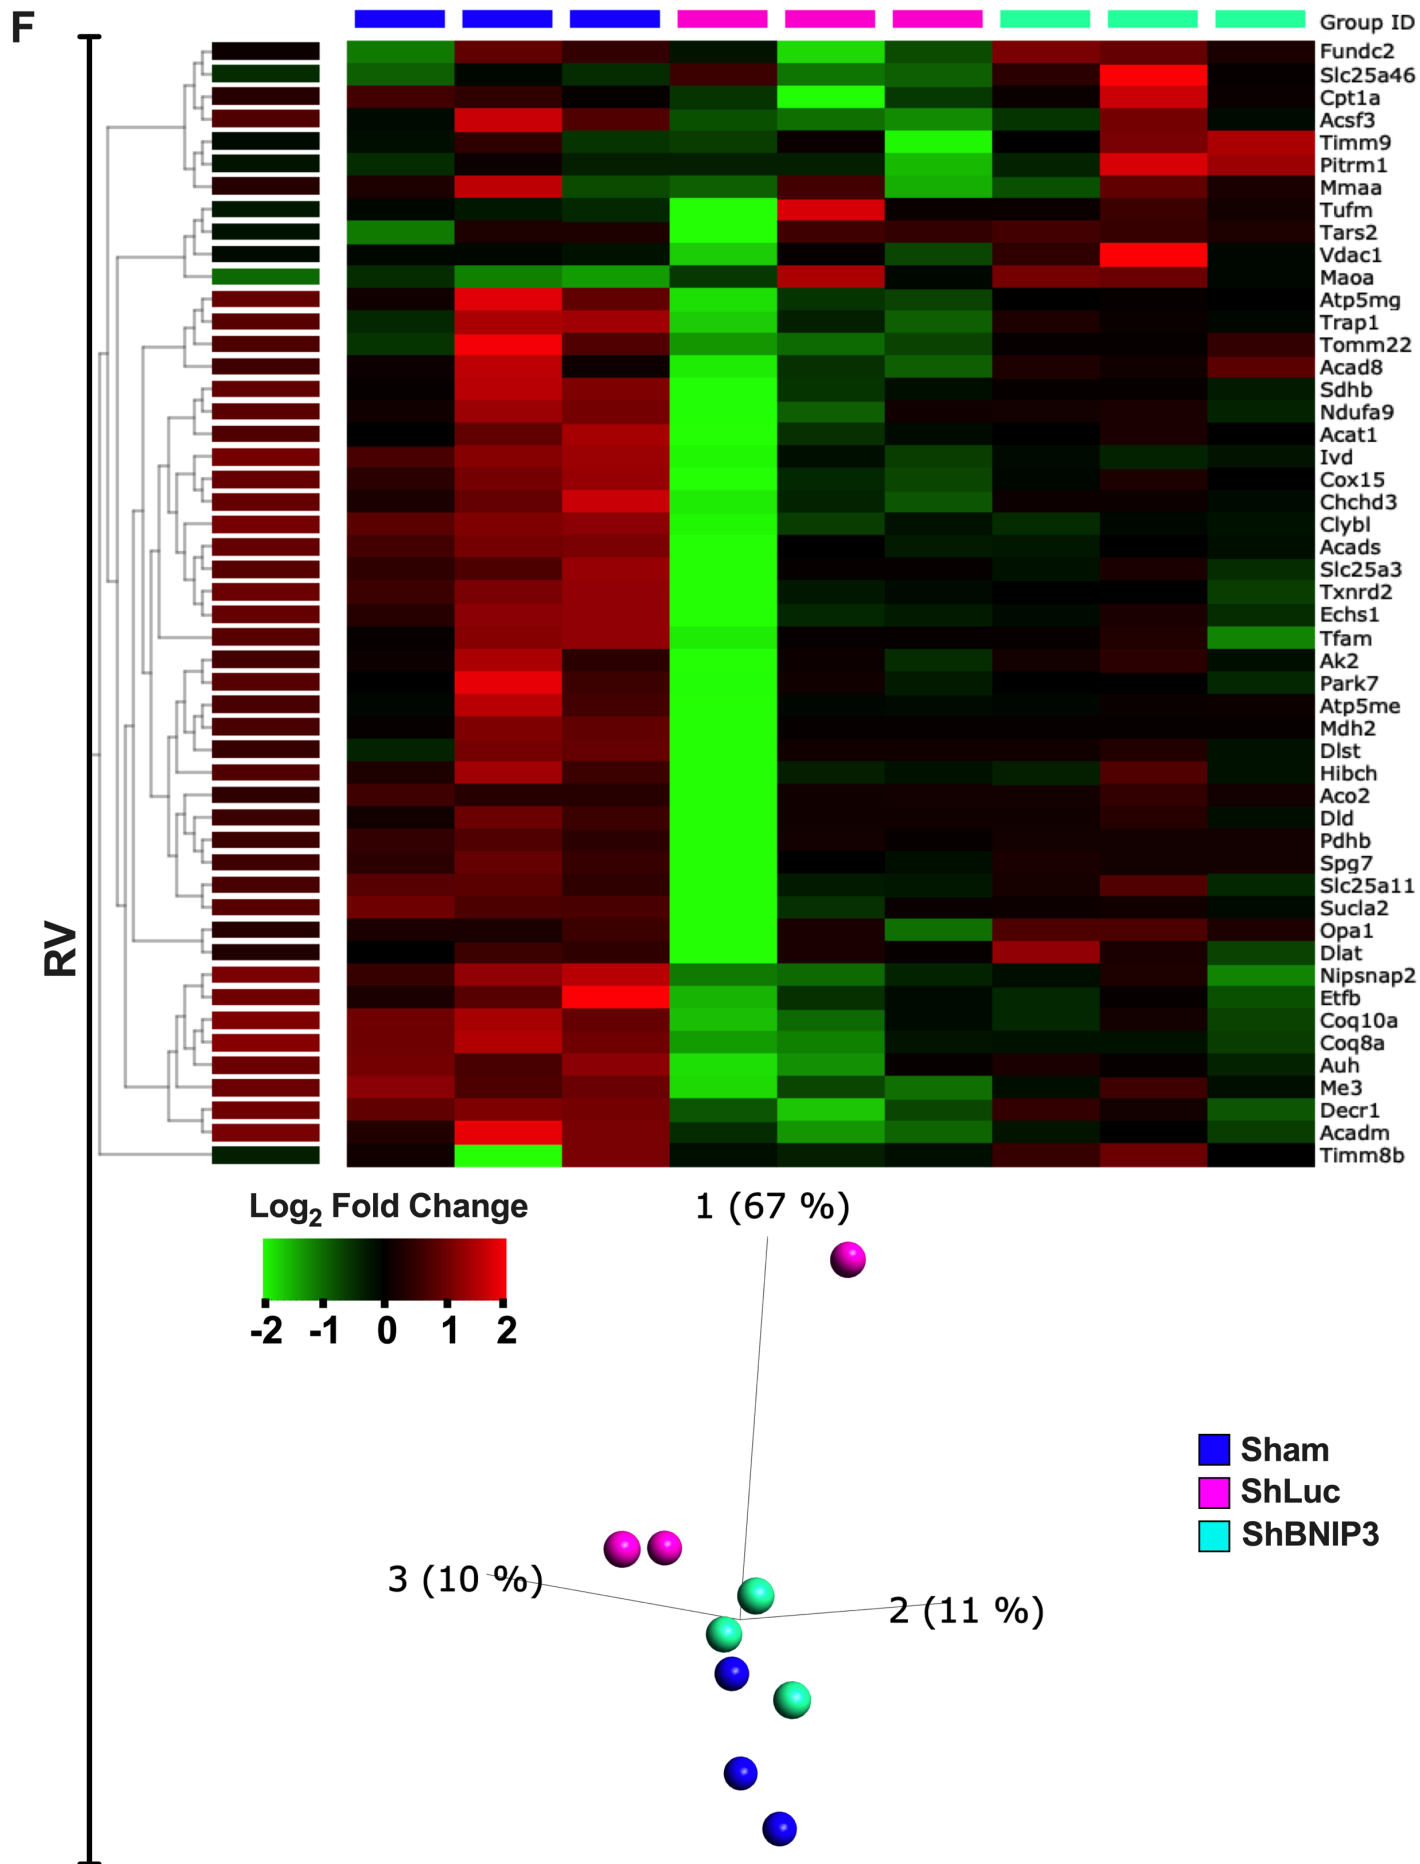

G

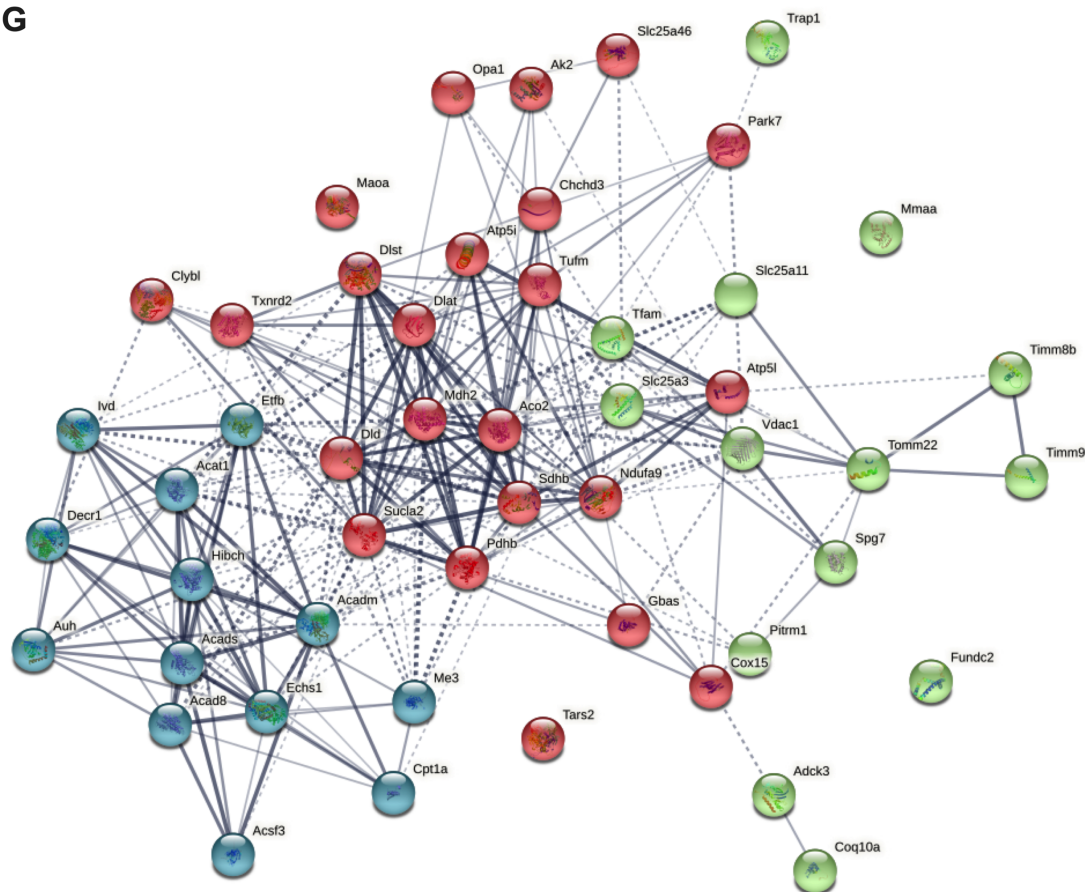

H

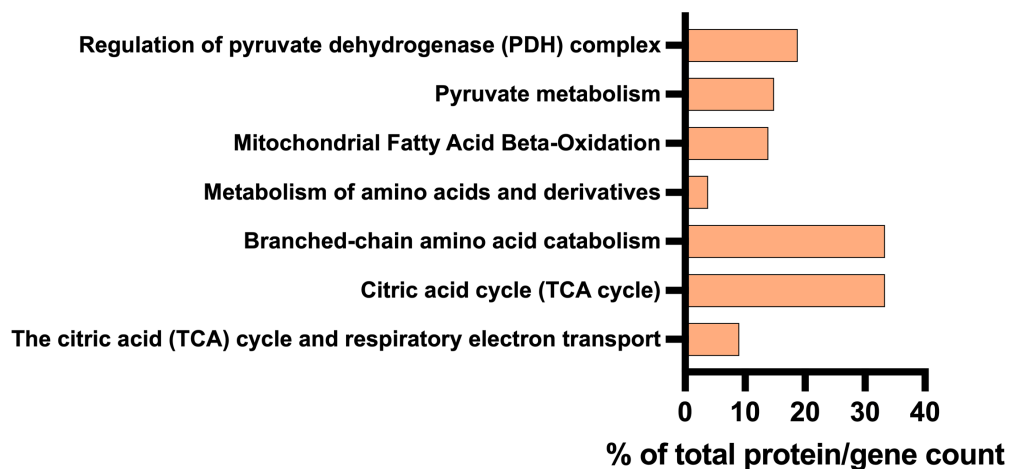

**Figure S5. Visualization of the commonly identified mt-proteins between the LV and RV proteomic datasets.** Heat maps and PCA plots show the relative  $\log_2$  fold expression and the variance in biological samples, respectively, in Sham, ShLuc and ShBNIP3 groups of the commonly identified mt-proteins between LV and RV shotgun proteomic datasets that were downregulated in ShLuc vs Sham (**A-B**) and those that were upregulated in ShBNIP3 vs ShLuc (**E-F**). Protein-protein interaction (PPI) network of the commonly identified mt-proteins between LV and RV shotgun proteomic datasets that were downregulated in ShLuc vs Sham (**C**) and those that were upregulated in ShBNIP3 vs ShLuc (**G**), PPI enrichment p-value of  $1.0e-16$ . Protein network was generated using STRING database. Each node represents a protein, whilst edges (lines) represent protein-protein associations based on physical and physiological interaction by confidence. The thicker the line is, the higher is the confidence. Each color represents a cluster of proteins with specific function. Bar graphs show some of the mt-reactome pathways that were downregulated in ShLuc vs Sham (**D**) and upregulated in ShBNIP3 vs ShLuc (**H**) by q-value. Data are presented as percentage of total protein count per reactome pathway.

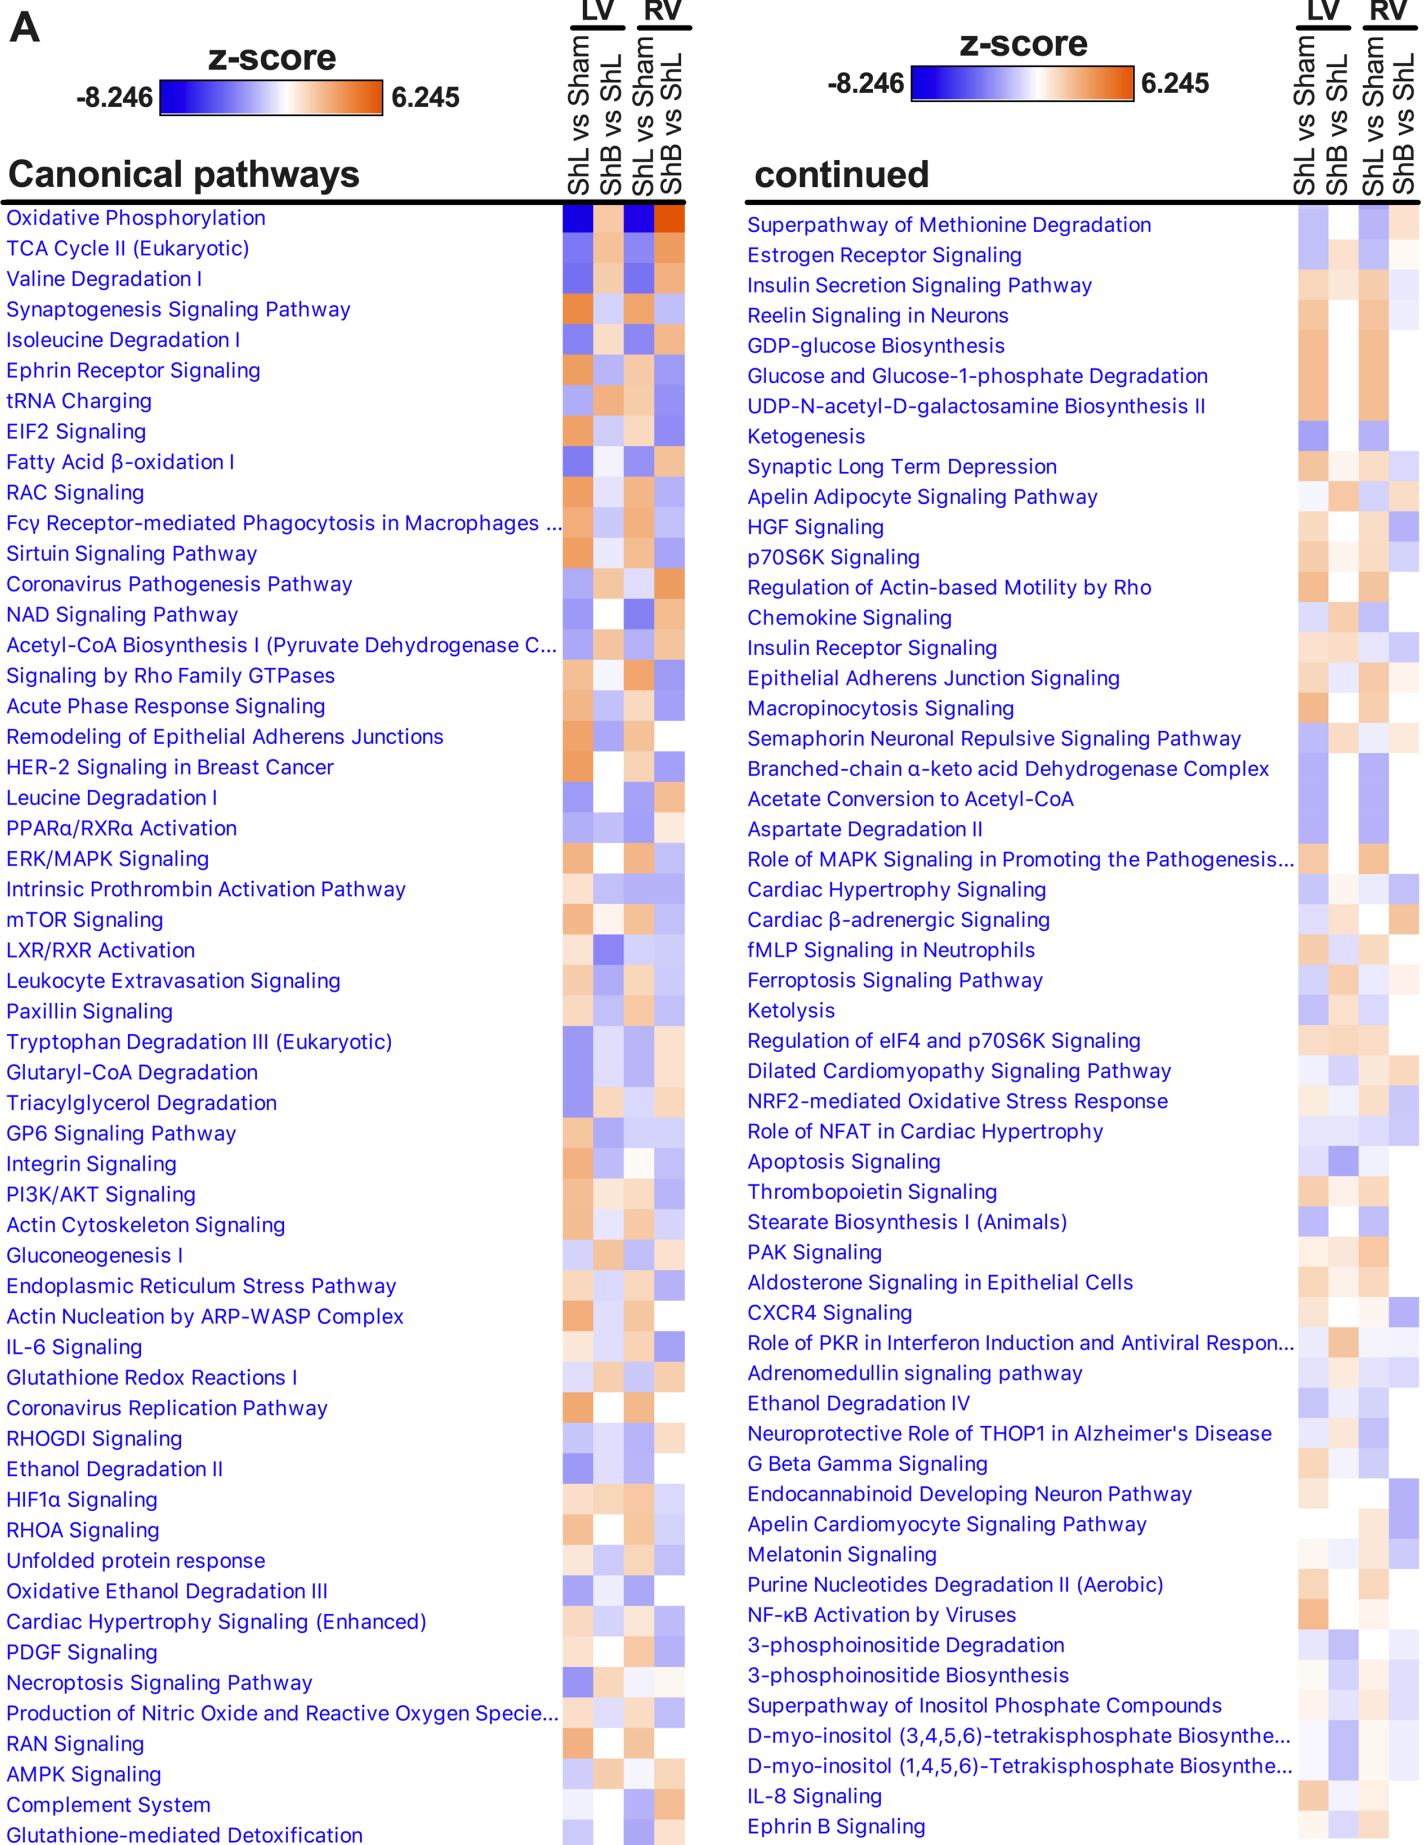

B

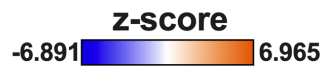**Upstream regulators**

KDM5A  
CLPP  
INSR  
PPARGC1A  
LARP1  
RB1  
CPT1B  
MAP4K4  
XBP1  
TGFB1  
DDX5  
HBA1/HBA2  
IL4  
NFE2L2  
MYL2  
let-7a-5p (and ot...  
miR-9-5p (and o...  
BACH1  
IGF1R  
TP53  
MLXIPL  
AR  
ATF4  
Hbb-b1  
SLC27A2  
PNPLA2  
KLF15  
CAB39L  
TSC2  
Akt  
TCR  
TFAM  
miR-30c-5p (an...  
miR-155-5p (mi...  
PPARA  
EDN1  
STK11  
HSF2  
HIF1A  
NRIP1  
IL9  
ZBTB7B  
Lh  
PITX2  
CEBPB  
OSM  
NFE2L1  
miR-16-5p (and ...  
PLA2R1  
STEAP3

**LV**  
**RV**  
ShL vs Sham  
ShB vs ShL  
ShL vs Sham  
ShB vs ShL

**continued**

CGA  
KLF6  
ERN1  
PPARD  
IL5  
AGT  
IPMK  
miR-1-3p (and ot...  
CSF1  
ACLY  
mir-122  
Esrra  
PPARG  
CA9  
YAP1  
OGT  
YARS2  
TRAP1  
GCK  
CTNNB1  
ANGPT2  
WNT3A  
UBA1  
NEUROG1  
MKNK1  
PPARGC1B  
ESR2  
FGF21  
G protein alpai  
MYC  
ESRRG  
CCR2  
TNF  
THBS4  
PDGF (family)  
PTEN  
SIRT1  
IL15  
MRTFB  
FOXO1  
BCL6  
IL6  
CD38  
PGR  
SURF1  
FOXA1  
TFRC  
HDL  
MAP2K1  
COL5A1

**LV**  
**RV**  
ShL vs Sham  
ShB vs ShL  
ShL vs Sham  
ShB vs ShL

**continued**

PDX1  
Perm1  
NKX2-2-AS1  
CD3  
MYCN  
RICTOR  
mir-1  
ZNF106  
RGS2  
TWIST1  
MRTFA  
NRG1  
IL3  
RET  
LDHB  
CETP  
PRKAA1  
EGFR  
ATF3  
PTCD1  
OMA1  
PML  
OGA  
ATF6  
IFNG  
PRL  
PLIN5  
NR4A1  
ESRRA  
MTOR  
P38 MAPK  
EIF2AK3  
APOE  
C2CD5  
NUBPL  
IL1B  
LMX1B  
CIDEA  
CUL3  
CDK4/6  
SCAP  
SLC22A5  
HNF4A  
HSPA5  
KITLG  
NR3C2  
CD300LF  
DMD  
E2F1  
TP73

**LV**  
**RV**  
ShL vs Sham  
ShB vs ShL  
ShL vs Sham  
ShB vs ShL

C

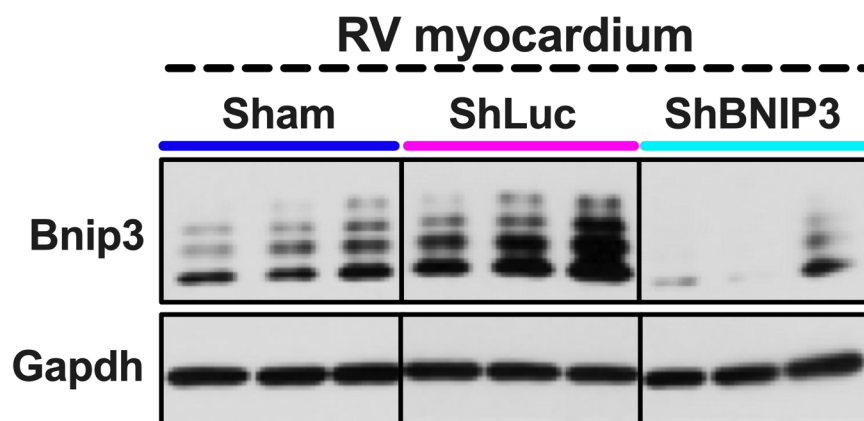

**Figure S6. Enriched *Canonical pathways* and *Upstream regulators* in the LV and RV proteomic datasets.** Heat maps of the *Canonical pathways* (A) and *Upstream regulators* (B) that were up-regulated/activated or down-regulated/inhibited in ShLuc vs Sham and ShBNIP3 vs ShLuc in LV and RV proteomic datasets. The orange and blue color intensities represent the z-score-based extent of up-regulation/activation or down-regulation/inhibition, respectively. The heat maps were generated in IPA after 'Core Analyses' of each of the two-group comparisons, i.e. ShLuc vs Sham and ShBNIP3 vs ShLuc, which were then compared with each other in IPA's 'Comparison Analyses' function. **C.** Immunoblotting show BNIP3 expression in RV myocardium of the Sham and HFrEF, ShLuc vs ShBNIP3, groups.

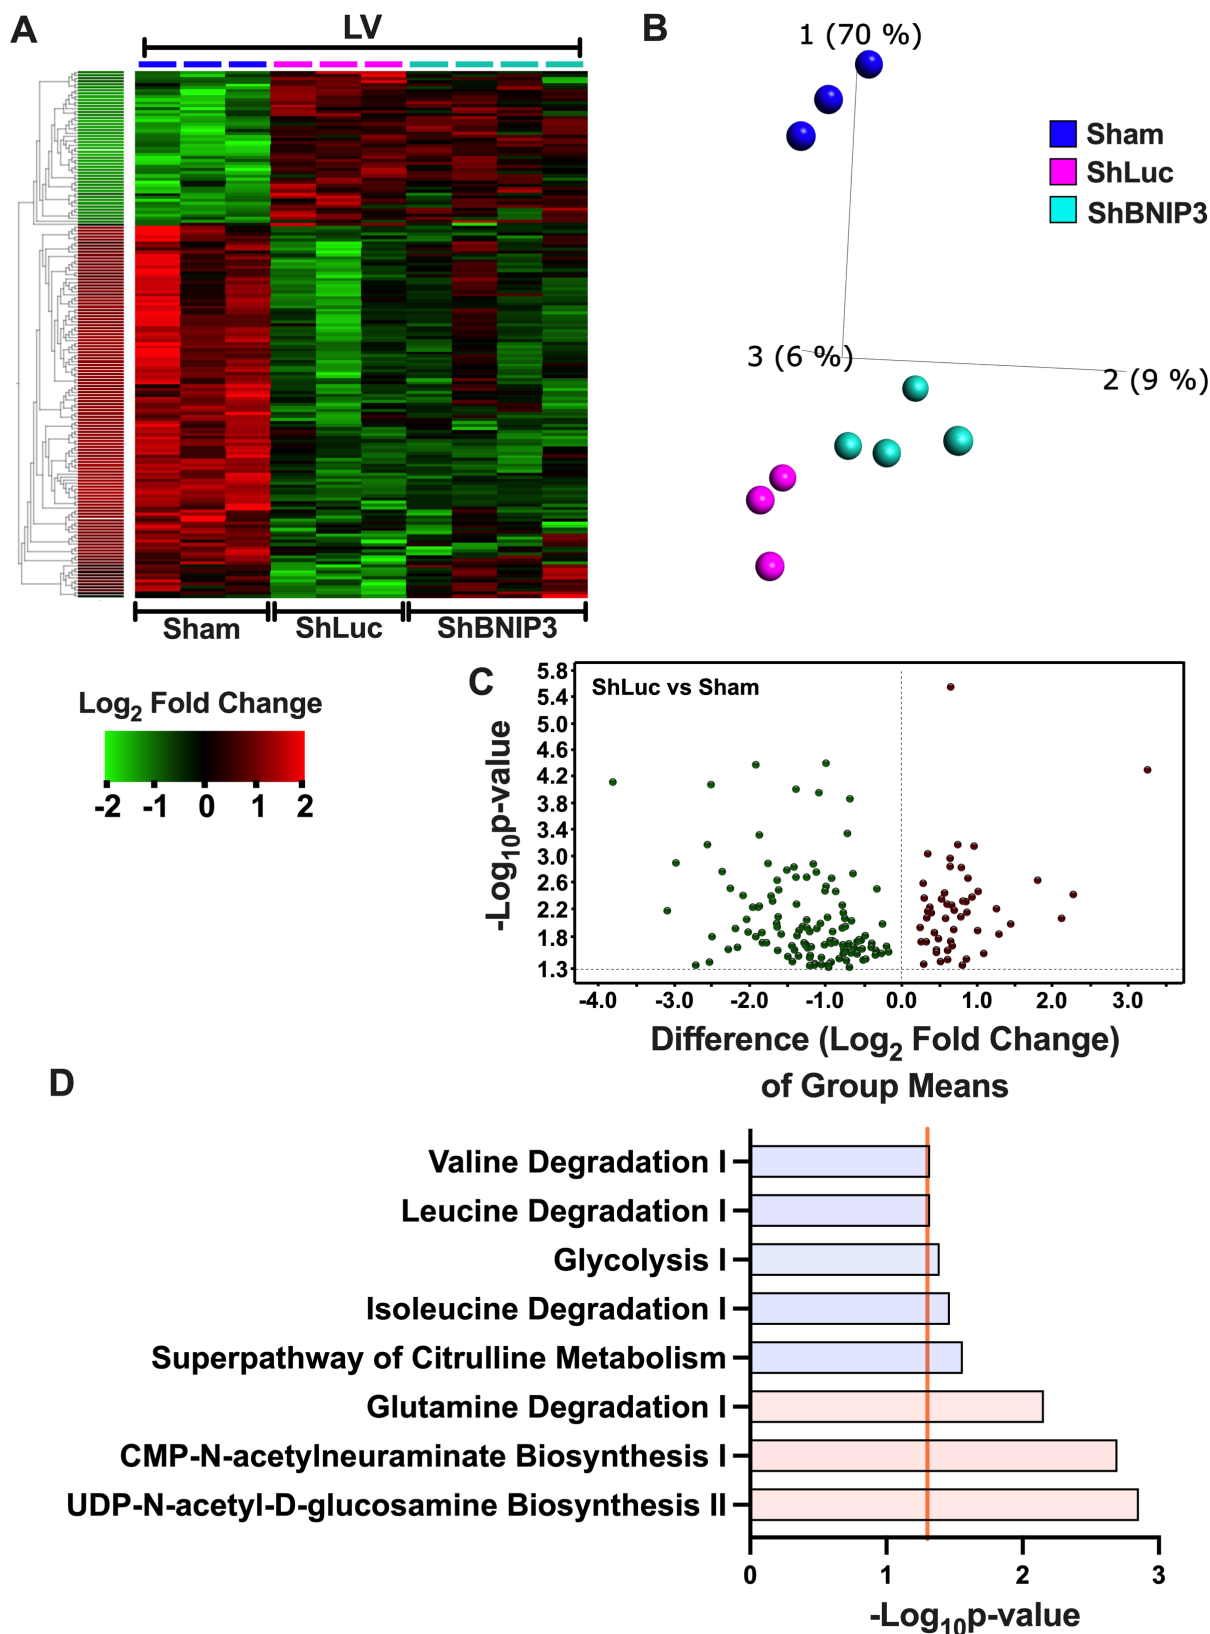

**Figure S7. Visualization and validation of the differentially expressed metabolites in ShLuc vs Sham in the LV myocardium untargeted metabolomic dataset.** **A-B.** Heat maps and PCA plots show the relative log<sub>2</sub> fold expression and the variance in biological samples, respectively, in Sham, ShLuc and ShBNIP3 groups of the differentially abundant metabolites in ShLuc vs Sham. **C.** Volcano plot shows the Log<sub>2</sub> fold change of group means for the metabolites whose abundance increased (red) or decreased (green) in ShLuc vs Sham; taking a cutoff -Log<sub>10</sub> p-value of 1.3 (P < 0.05). **D.** Metabolic pathways that were predicted to be enhanced (orange bar) or attenuated (blue bar) in ShLuc vs Sham; taking a cutoff -Log<sub>10</sub> p-value of 1.3 (orange line).

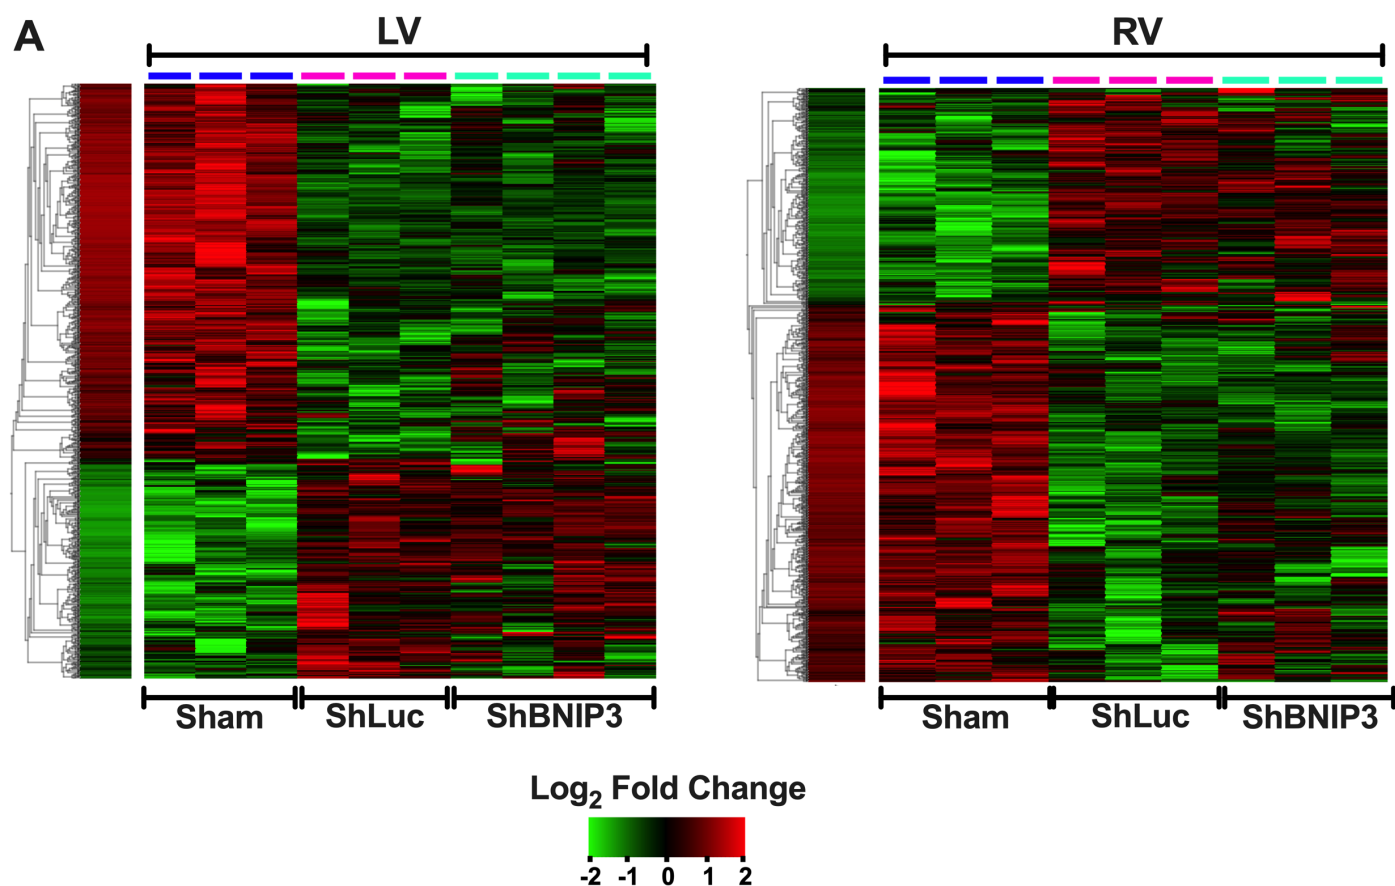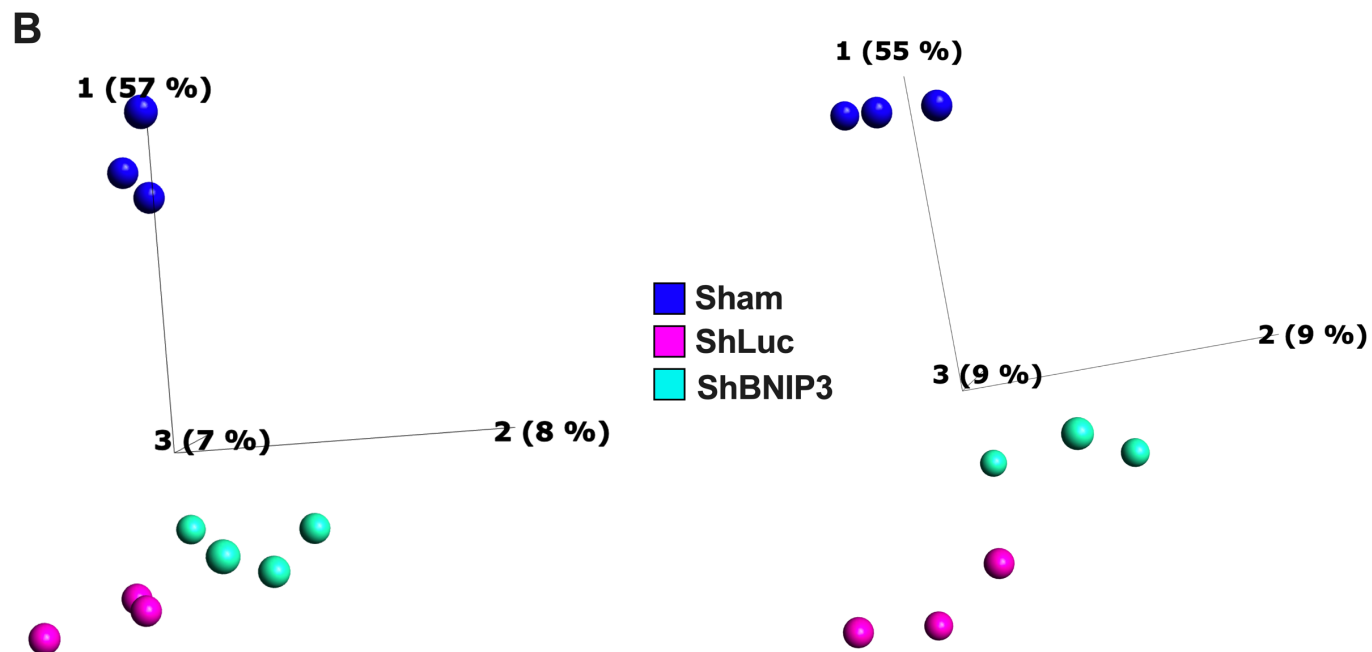

**Figure S8. Visualization of the differentially expressed phosphosites in ShLuc vs Sham in the LV and RV myocardium p-proteomic datasets. A-B.** Heat maps and PCA plots show the relative log<sub>2</sub> fold expression and the variance in biological samples, respectively, in Sham, ShLuc and ShBNIP3 groups of the differentially expressed phosphosites in ShLuc vs Sham in LV (left), and RV (right) shotgun phosphoproteomic datasets.



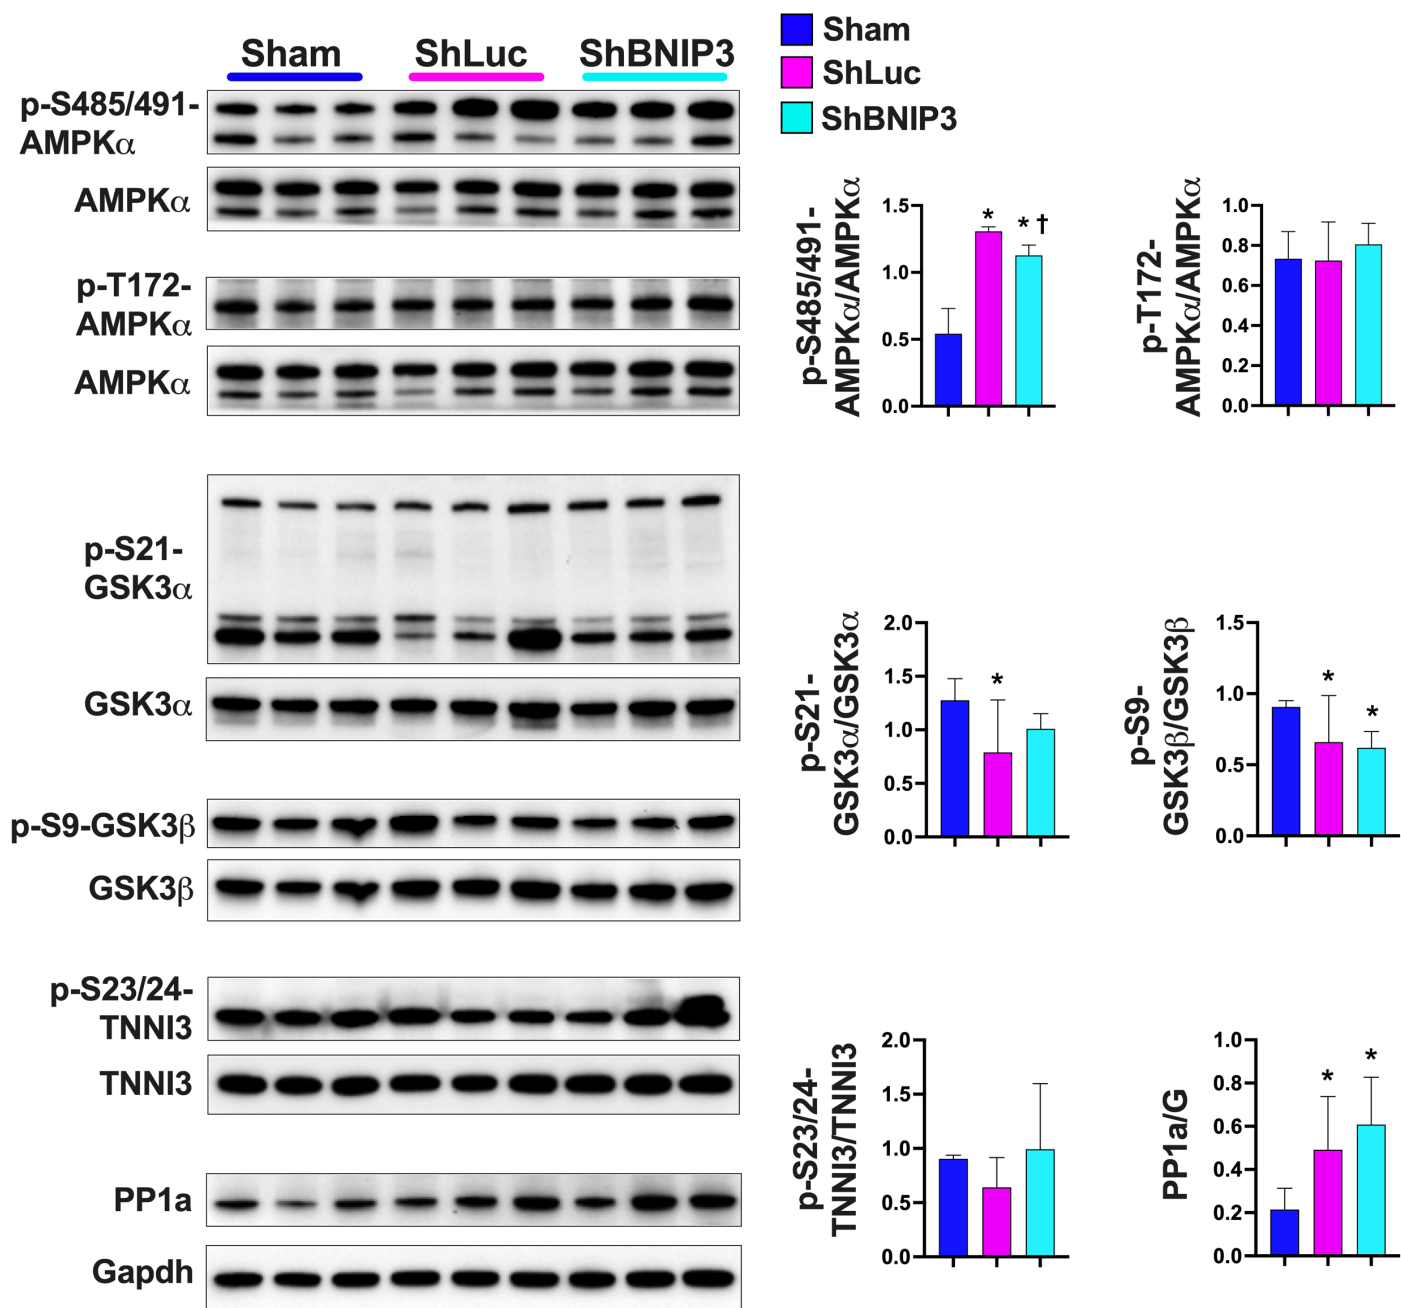

**Figure S9.** Western blots show the phosphorylation of AMPK at serine 485/491 and threonine 172 residues and downstream targets of PKA as well as the expression of the serine/threonine-protein phosphatase PP1-alpha (PP1a) in Sham, ShLuc and ShBNIP3 groups. Bar graphs are presented as mean  $\pm$  SD, \*P < 0.05 vs Sham, and  $^{\dagger}$ P < 0.05 vs. ShLuc.



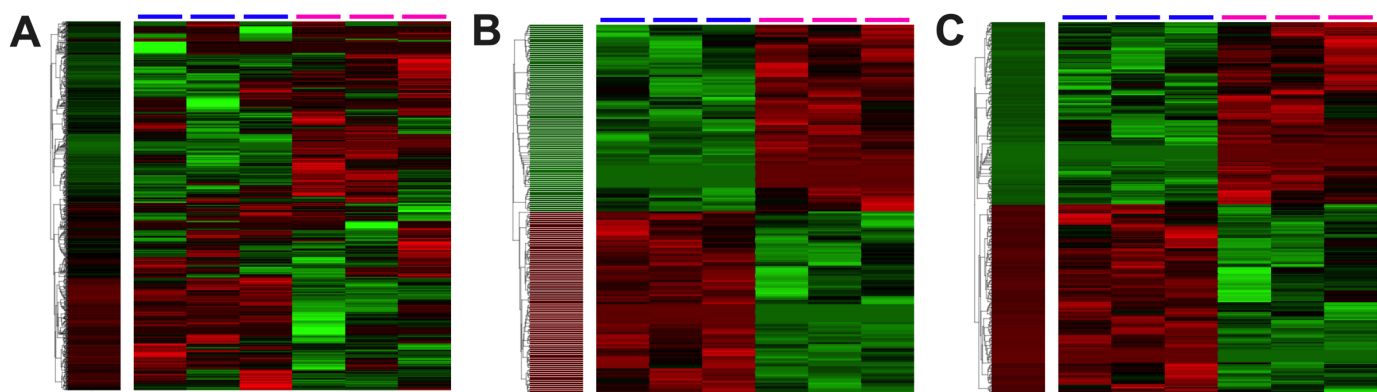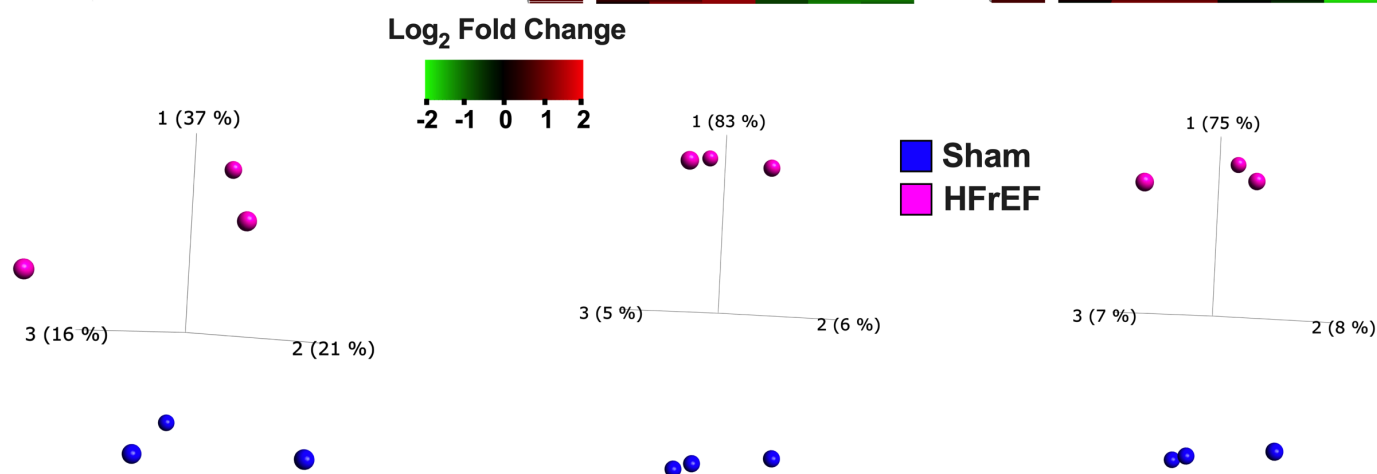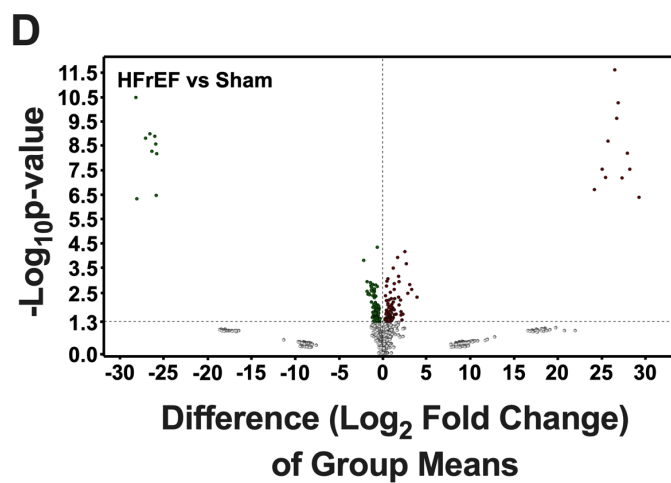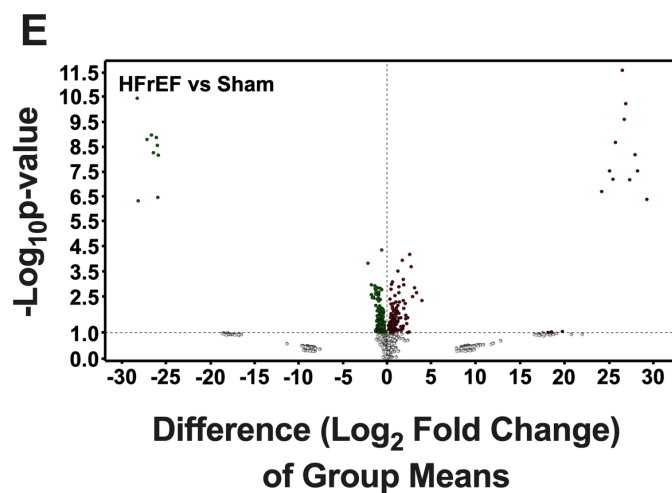

F

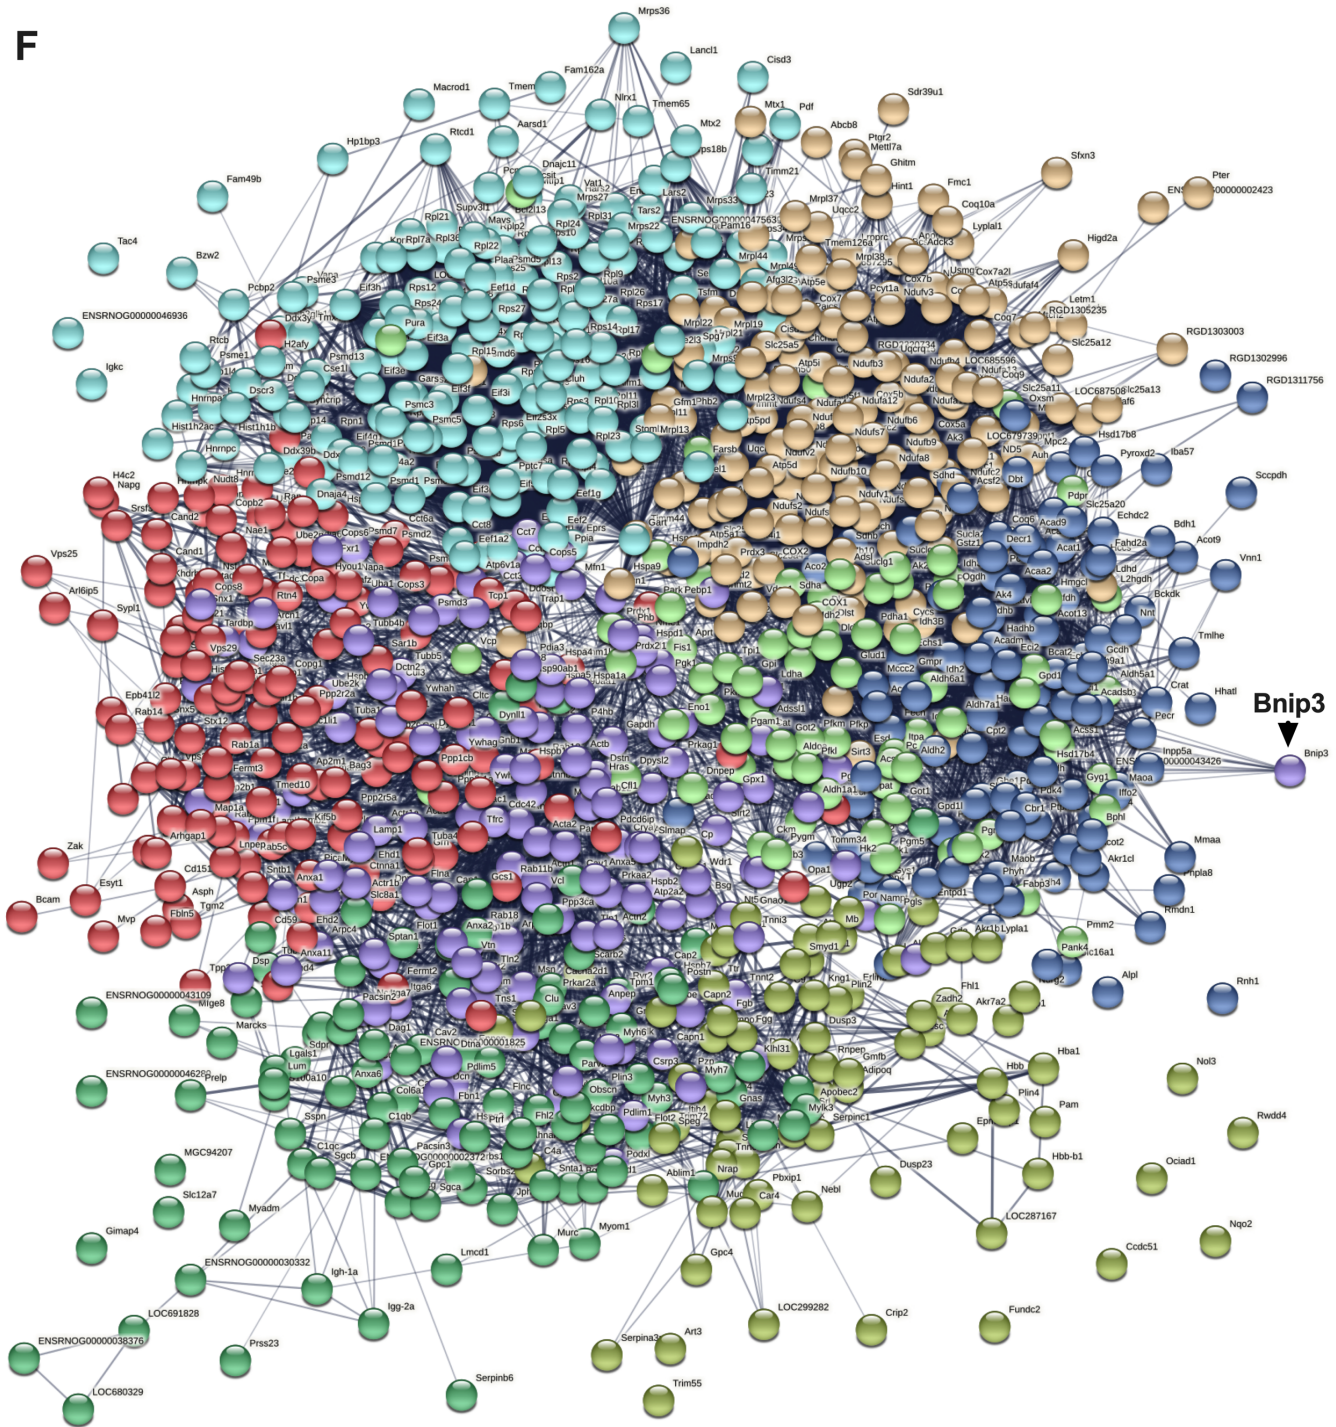

**Figure S10. BNIP3 interactome in rat LV myocardium by BNIP3 Co-IP and mass spectrometry. A-C.** Heat maps and PCA plots show the relative  $\log_2$  fold expression and the variance in biological samples, respectively, in Sham and HFrEF rat LV myocardium of the total identified BNIP3 interacting proteins (A) and those that were differentially expressed taking a cutoff p-value of  $< 0.05$  (B) and  $< 0.1$  (C). **D-E.** Volcano plots show the  $\log_2$  fold change of group means for the identified BNIP3 interacting proteins whose relative expression increased (red) or decreased (green) in HFrEF vs Sham rat samples taking a cutoff  $-\log_{10}$  p-value of 1.3 ( $P < 0.05$ ) (D) or 1.0 ( $P < 0.1$ ) (E). **F.** PPI network of the total identified BNIP3 interacting proteins in rat LV myocardium, PPI enrichment p-value of  $1.0 \times 10^{-16}$ . Protein network was generated using STRING database. Each node represents a protein, whilst edges (lines) represent protein-protein associations based on physical and physiological interaction by confidence. The thicker the line, the higher is the confidence. Each color represents a cluster of proteins with specific function.

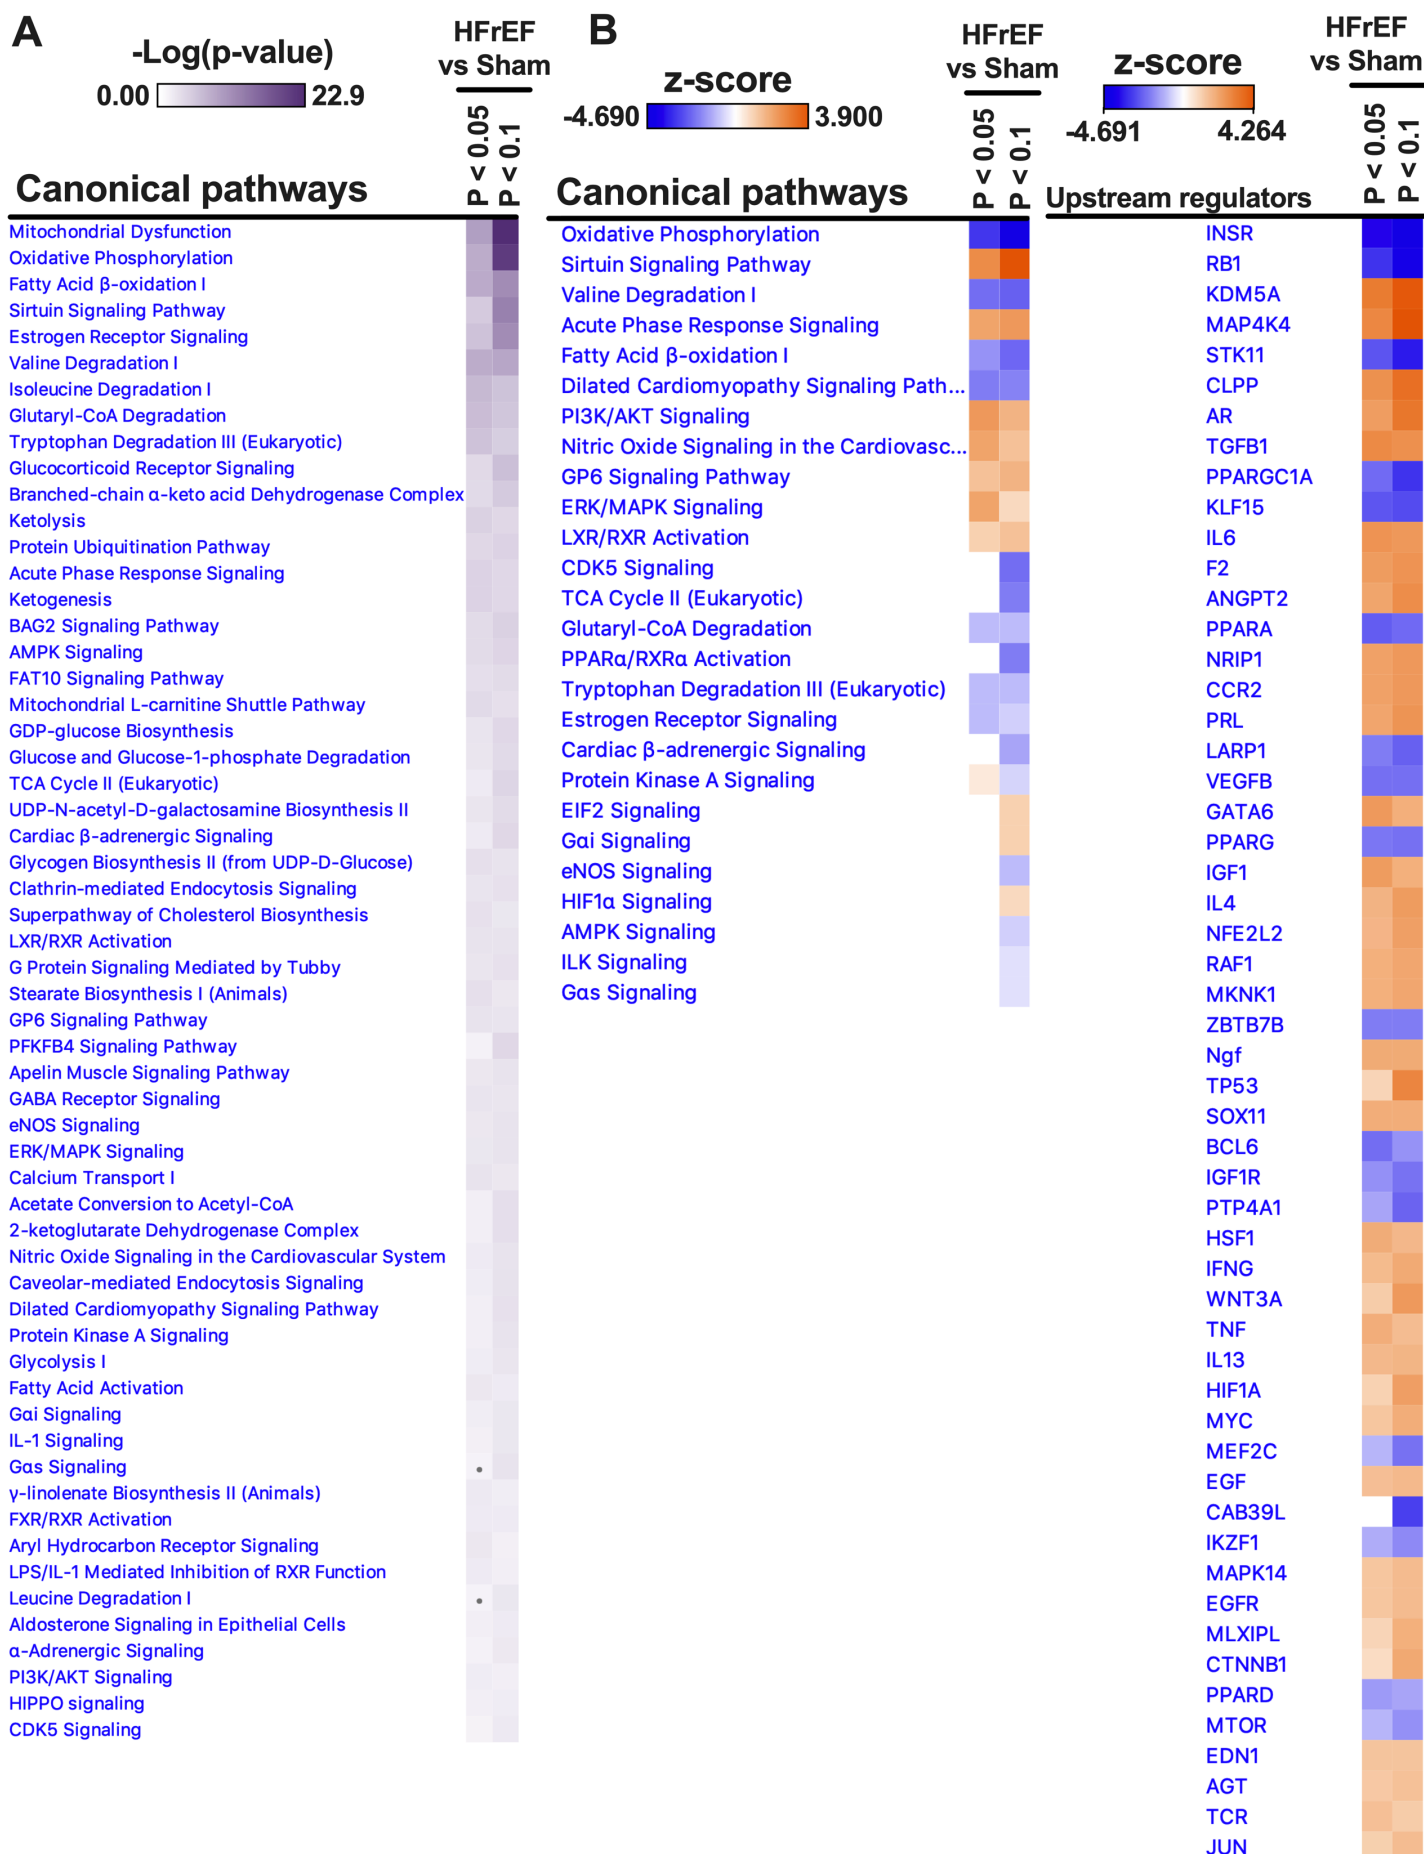

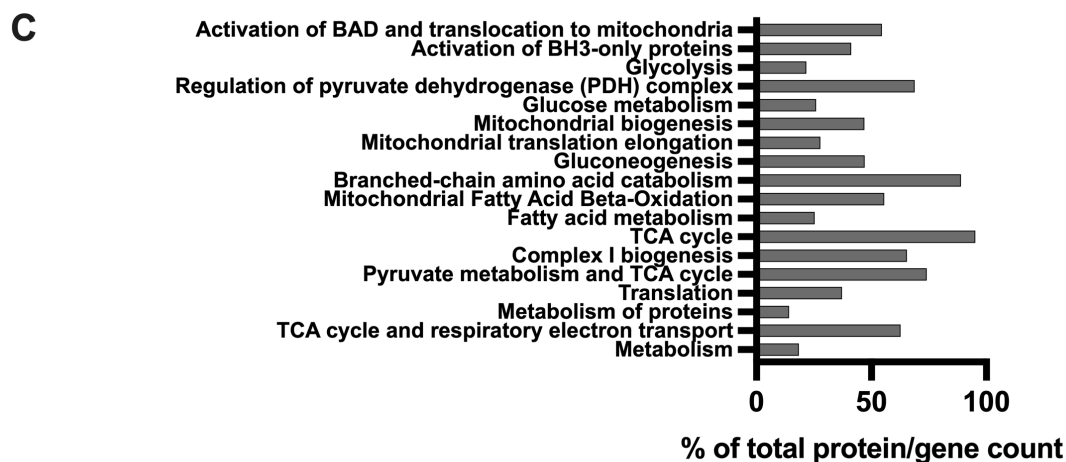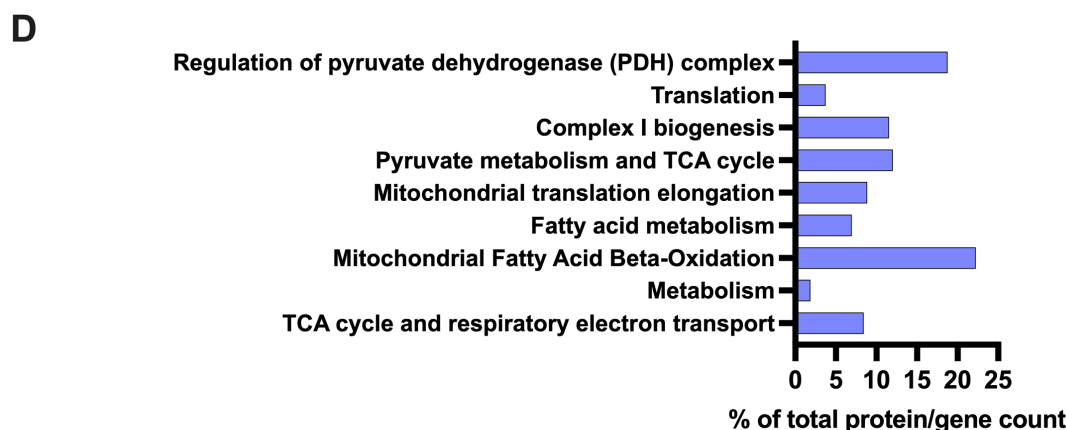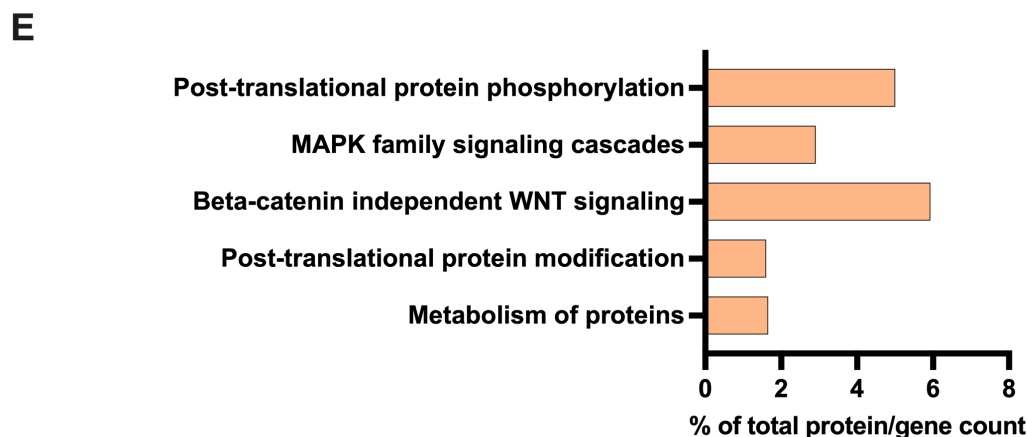

**Figure S11. BNIP3 interactome enriched *Canonical Pathways*, *Upstream regulators*, and *Reactome pathways* in rat LV myocardium. A.** Heat maps of the *Canonical pathways* that were enriched by  $-\text{Log}_{10}$  p-value in BNIP3 interactome HFrEF vs Sham rat LV myocardium. **B.** Heat maps of the *Canonical pathways* and *Upstream regulators* that were up-regulated/activated or down-regulated/inhibited in BNIP3 interactome HFrEF vs Sham rat LV myocardium. The orange and blue color intensities represent the z-score-based extent of up-regulation/activation or down-regulation/inhibition, respectively. In both A and B, the heat maps were generated in IPA after 'Core Analyses' of the two-group comparison (HFrEF vs Sham) taking a cutoff p-value of  $< 0.05$  vs  $< 0.1$ , which were then compared with each other in IPA's 'Comparison Analyses' function. **C-E.** BNIP3 interactome enriched reactome pathways by q-value for the total identified BNIP3 interacting proteins in rat LV myocardium (**C**) and those that were differentially downregulated (**D**) or upregulated (**E**) in HFrEF vs Sham. Data are presented as percentage of total protein count per reactome pathway.



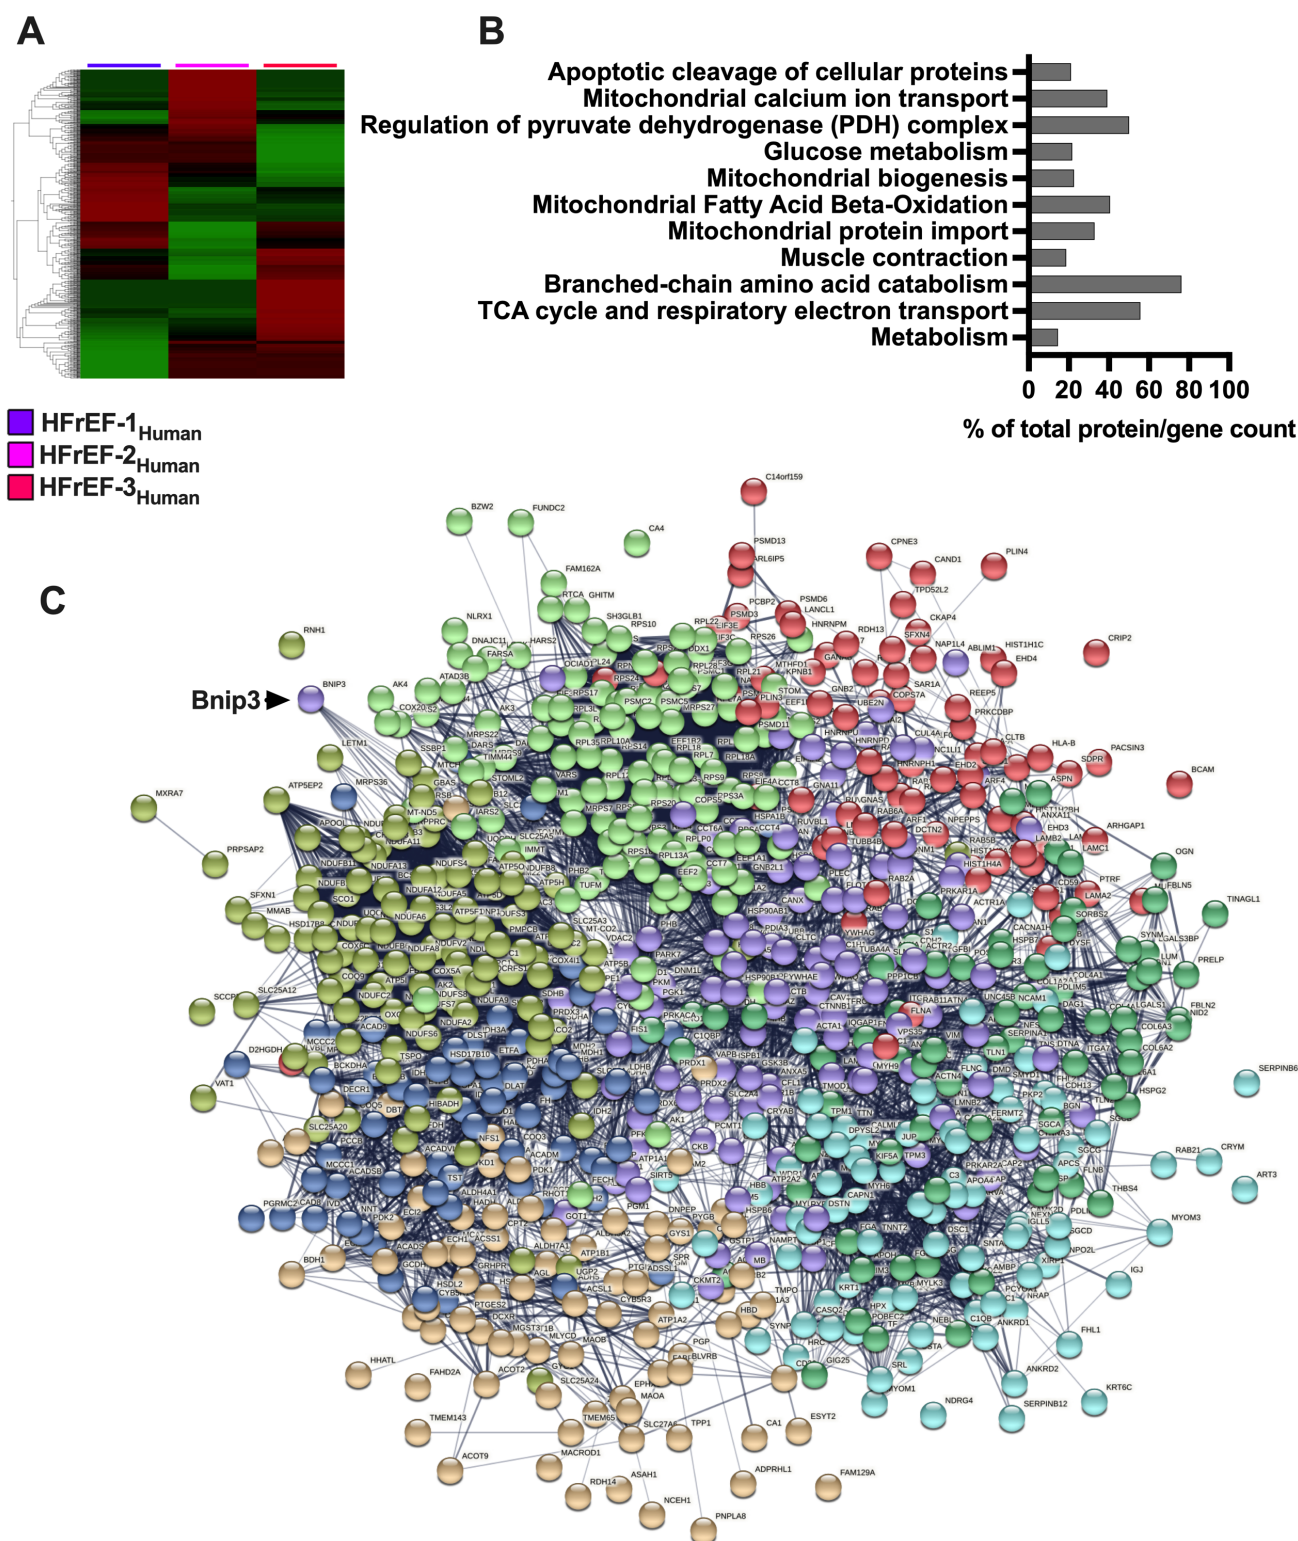

**Figure S12. Visualization of BNIP3 interactome in Human HFrEF LV myocardium.** **A.** Heat map show the relative  $\log_2$  fold expression of the total identified BNIP3 interacting proteins for each of the human HFrEF LV myocardium biological sample. **B.** BNIP3 interactome enriched reactome pathways by q-value for the total identified BNIP3 interacting proteins in human HFrEF LV myocardium. Data are presented as percentage of total protein count per reactome pathway. **C.** PPI network of the total identified BNIP3 interacting proteins in human HFrEF LV myocardium, PPI enrichment p-value of  $1.0e-16$ . Protein network was generated using STRING database. Each node represents a protein, whilst edges (lines) represent protein-protein associations based on physical and physiological interaction by confidence. The thicker the line is, the higher is the confidence. Each color represents a cluster of proteins with specific function.



biological samples, respectively, of the commonly identified BNIP3 interacting proteins that were differentially expressed in HFrEF vs Sham with a cutoff p-value of  $< 0.1$ . **B.** PPI network of the commonly identified BNIP3 interacting proteins in rat and human HFrEF LV myocardium, PPI enrichment p-value of  $1.0\text{e-}16$ . Protein network was generated using STRING database. Each node represents a protein, whilst edges (lines) represent protein-protein associations based on physical and physiological interaction by confidence. The thicker the line is, the higher is the confidence. Each color represents a cluster of proteins with specific function. Highest interaction was between BNIP3 and VDAC1. Black and green arrowheads point at BNIP3 and VDAC1 nodes, respectively.



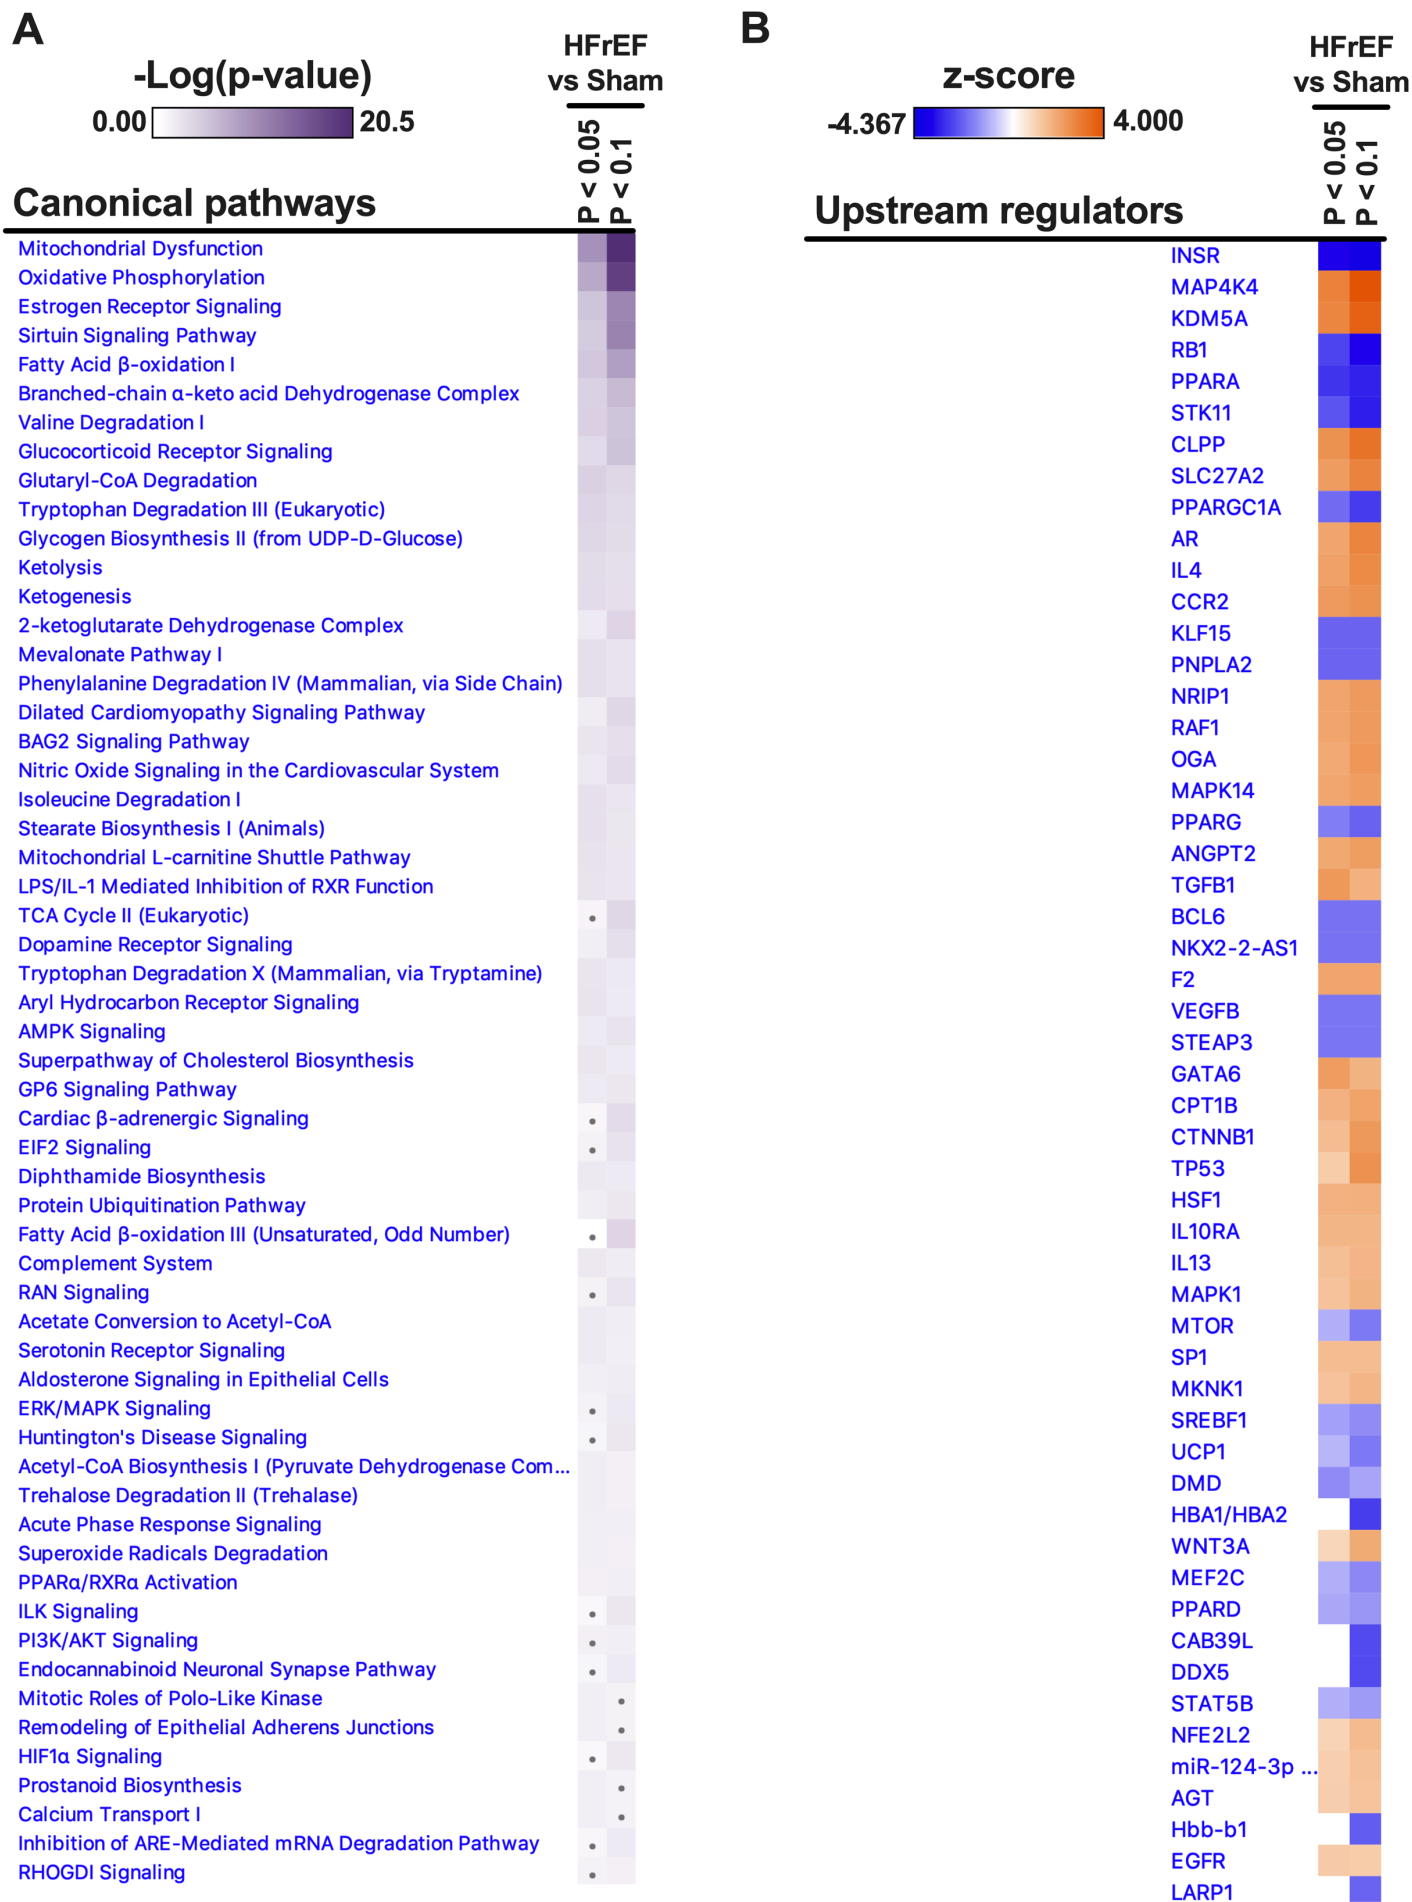



**C**

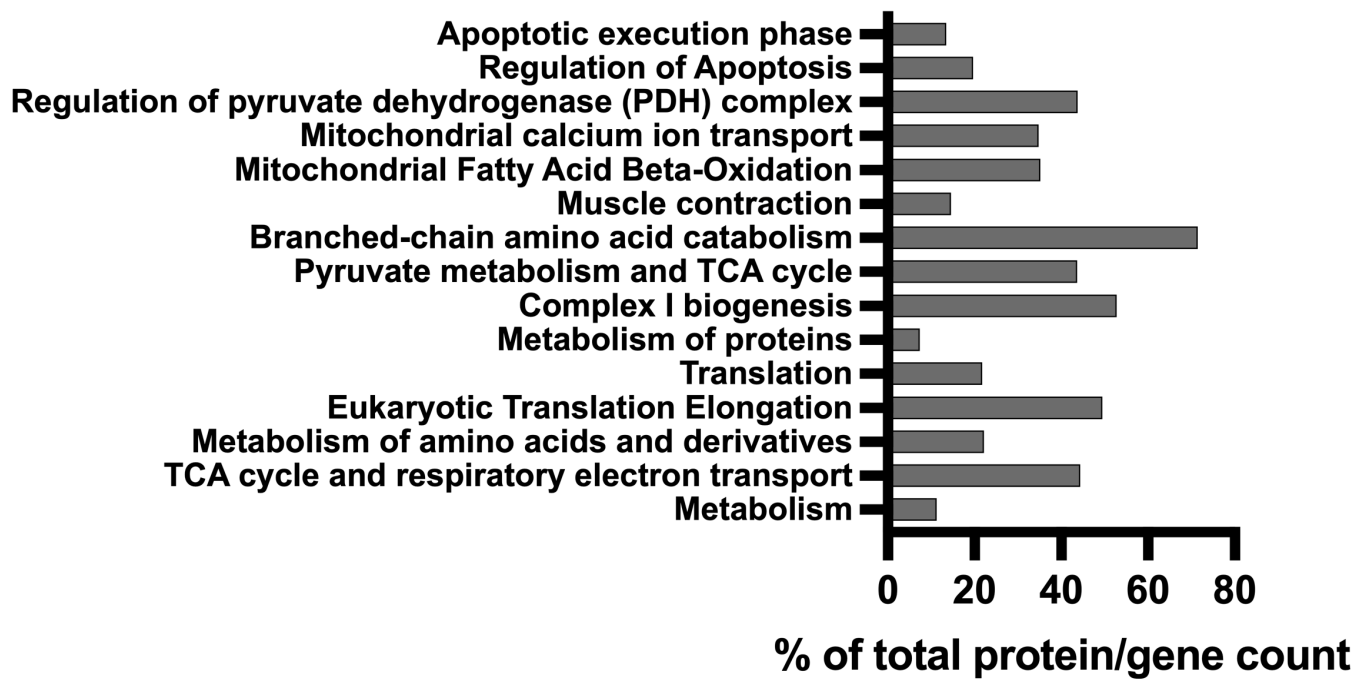

**Figure S14. Enriched canonical pathways and Upstream regulators of the commonly identified BNIP3 interacting proteins in rat and human LV myocardium.** Heat maps of the *Canonical pathways* that were enriched by  $-\text{Log}_{10}$  p-value (**A**) and *Upstream regulators* (**B**) that were up-regulated/activated or down-regulated/inhibited in HFrEF vs Sham of the commonly identified BNIP3 interacting proteins between rat and human LV myocardium. The orange and blue color intensities represent the z-score-based extent of up-regulation/activation or down-regulation/inhibition, respectively. Heat maps were generated in IPA after 'Core Analyses' of the two-group comparison (HFrEF vs Sham) taking a cutoff p-value of  $< 0.05$  vs  $< 0.1$ , which were then compared with each other in IPA's 'Comparison Analyses' function. **C.** BNIP3 interactome enriched reactome pathways by q-value for the commonly identified BNIP3 interacting proteins between human and rat LV myocardium. Data are presented as percentage of total protein count per reactome pathway.
